1 **YAP and TAZ regulate adherens junction dynamics and endothelial cell distribution during vascular**  
2 **development**

3

4

**Short title: YAP /TAZ in vascular development**

5

6 Filipa Neto<sup>1,2</sup>, Alexandra Klaus-Bergmann<sup>1,3</sup>, Yu-Ting Ong<sup>4</sup>, Silvanus Alt<sup>1</sup>, Anne-Clémence Vion<sup>1,3</sup>, Anna  
7 Szymborska<sup>1,3</sup>, Joana R. Carvalho<sup>5</sup>, Irene Hollfinger<sup>1</sup>, Eireen Bartels-Klein<sup>1,3</sup>, Claudio A. Franco<sup>5</sup>,  
8 Michael Potente<sup>4,6,7</sup>, Holger Gerhardt<sup>1,2,3,8,9,10</sup>

9

10 <sup>1</sup> *Max-Delbrück-Center for Molecular Medicine, Robert-Rössle-Strasse 10, 13125 Berlin, Germany*

11 <sup>2</sup> *Vascular Biology Laboratory, London Research Institute – Cancer Research UK, Lincoln's Inn Fields*

12 *Laboratories, 44 Lincoln's Inn Fields, WC2A 3LY London, United Kingdom*

13 <sup>3</sup> *DZHK (German Center for Cardiovascular Research), partner site Berlin*

14 <sup>4</sup> *Angiogenesis & Metabolism Laboratory, Max Planck Institute for Heart and Lung Research, 61231 Bad  
15 Nauheim, Germany*

16 <sup>5</sup> *Vascular Morphogenesis Laboratory, Instituto de Medicina Molecular, Faculdade de Medicina  
17 da Universidade de Lisboa, Lisboa, Portugal*

18 <sup>6</sup> *International Institute of Molecular and Cell Biology, 02-109 Warsaw, Poland*

19 <sup>7</sup> *DZHK (German Center for Cardiovascular Research), partner site Frankfurt Rhine-Main, 13347  
20 Berlin, Germany*

21 <sup>8</sup> *Vascular Patterning Laboratory, Vesalius Research Center, VIB, Leuven, Belgium*

22 <sup>9</sup> *Vascular Patterning Laboratory, Vesalius Research Center, Department of Oncology, KU Leuven,  
23 Herestraat 49, B-3000 Leuven, Belgium*

24 <sup>10</sup> *Berlin Institute of Health (BIH), Berlin, Germany*

25

26 \*Co-corresponding author contact information

27 Professor Dr. Holger Gerhardt

28 Max-Delbrück-Center for Molecular Medicine, Robert-Rössle-Strasse 10, 13125 Berlin, Germany

29 E-mail: holger.gerhardt@mdc-berlin.de;

30 Tel: +49 (0)30 9406 1780; Fax: +49 (0)30 9406 1771.

31

32 Dr. Michael Potente

33 Max Plank Institute for Heart and Lung Research, Ludwigstr. 43, 61231 Bad Nauheim

34 E-mail: michael.potente@mpi-bn.mpg.de

35 Tel: +49 6032 705 11 07; Fax: +49 6032 705 11 04;

36

37 Keywords:

38 Endothelial cells, YAP, TAZ, VE-Cadherin, adherens junctions, vascular development, Notch, BMP.

39

40 **ABSTRACT**

41

42 Formation of a hierarchically organized blood vessel network by sprouting angiogenesis is critical for  
43 tissue growth, homeostasis and regeneration. How in this process endothelial cells arise in adequate  
44 numbers and arrange suitably to shape a functional vascular network is poorly understood. Here we  
45 show that YAP and TAZ promote stretch-induced proliferation and rearrangements of endothelial cells  
46 whilst preventing bleeding in developing vessels. Mechanistically, YAP and TAZ increase VE-cadherin  
47 turnover at junctions and suppress endothelial Notch and BMP signaling, two key pathways that limit  
48 sprouting and endothelial dynamics. Consequently, the loss of YAP and TAZ leads to stunted sprouting  
49 with local aggregation as well as scarcity of endothelial cells, branching irregularities and junction  
50 defects. Forced nuclear activity of TAZ instead drives hypersprouting and vascular hyperplasia. We  
51 propose a new model in which YAP and TAZ integrate mechanical signals with Notch and BMP  
52 signaling to balance endothelial cell distribution in angiogenic vessels.

53

54 **INTRODUCTION**

55

56 A long-standing question in developmental and cell biology relates to how cells integrate mechanical  
57 and chemical signals to orchestrate the morphogenic behaviours that ensure adequate tissue  
58 patterning. During sprouting angiogenesis, the arrangement and distribution of cells rather than their  
59 numbers appear to drive morphogenesis of the vascular tree. Recent data showing unaltered  
60 remodelling in the absence of endothelial cell apoptosis and normal branching frequency across a range  
61 of endothelial cell densities support this idea (1). In the extreme, however, too few cells will jeopardize  
62 network formation and stability (2), whereas too many cells might compromise vessel calibre control (1).  
63 Functional network formation therefore needs to establish the right number of cells in the right place,  
64 and distribute them such that the hierarchical branching pattern is supported. What establishes such a  
65 balance has remained unclear. Here we provide evidence for the yes-associated protein 1 (YAP) and its  
66 paralog WW domain containing transcription regulator 1 (TAZ) to be critically involved as endothelial cell  
67 autonomous regulators in this process.

68 YAP and TAZ, two transcriptional co-activators initially discovered as effectors of the Hippo  
69 signalling pathway, play a central role in organ size control via regulation of proliferation and apoptosis  
70 (3-5). In confluent cells, YAP and TAZ are phosphorylated by the Hippo kinase cascade, and retained in  
71 the cytoplasm. In sparse cells, YAP and TAZ remain unphosphorylated and can translocate to the  
72 nucleus, where they bind transcription factors inducing the expression of pro-proliferative and anti-  
73 apoptotic genes. Other stimuli have been found to regulate YAP and TAZ nuclear translocation and  
74 activity – these include, among others, G-protein coupled receptors (GPCRs) (6), junctional proteins (7,  
75 8), and mechanical stimuli (9, 10). Furthermore, besides cell proliferation and apoptosis, YAP and TAZ  
76 also regulate cell differentiation (11), migration (12) and actomyosin contraction (13). In vascular  
77 development, the roles of YAP and TAZ are not fully understood. *Yap* null mutant zebrafish develop an  
78 initially normal vasculature but display increased vessel collapse and regression. *Yap/Taz* double  
79 mutant zebrafish die before the onset of circulation with severe developmental defects, precluding  
80 analysis of vascular development in this context (14). Endothelial-specific deletion of *Yap* in mice using  
81 the *Tie2-Cre* transgenic line is embryonically lethal due to heart valve defects caused by failed  
82 endothelial-to-mesenchymal transition (15). During post-natal development of the mouse retina, YAP  
83 was shown to regulate vascular density and branching by promoting the transcription of *Angiopoetin-2*  
84 (16). While these studies point towards an important role for YAP in regulating blood vessel formation  
85 and maintenance, none of them addressed the endothelial cell autonomous requirement for YAP during

86 sprouting angiogenesis. In addition, no study has addressed a potential requirement for TAZ during  
87 angiogenesis, and the possible redundancy between both proteins in this context. Finally, the possible  
88 interplay between YAP/TAZ and the major signalling pathways regulating angiogenesis has not been  
89 assessed.

90 Here, we show that YAP and TAZ are both expressed and active in sprouting ECs and critical  
91 for sprouting angiogenesis. The inducible, endothelial-specific combined deletion of YAP and TAZ leads  
92 to severe morphogenic defects consistent with impaired junctional remodelling *in vivo*. Furthermore, we  
93 found that the loss of YAP and TAZ decreased VE-Cadherin turnover and increased cell-cell coupling.  
94 We also discovered that endothelial YAP and TAZ strongly regulate endothelial Notch and BMP  
95 signalling *in vitro* and *in vivo*, together suggesting that YAP and TAZ integrate mechanical stimuli with  
96 key transcriptional regulators of endothelial sprouting and cell rearrangements during angiogenesis.

97

98

## 99 **RESULTS**

100

### 101 **YAP and TAZ have distinct expression patterns in endothelial cells of developing vessels and** 102 **localise to the nucleus at the sprouting front.**

103 Immunofluorescence staining in the postnatal mouse retina showed that YAP and TAZ are distinctly  
104 expressed in the ECs of the developing vasculature (Figure 1). While YAP is evenly expressed  
105 throughout the vasculature (Figure 1 A-D), the expression of TAZ is especially prominent at the  
106 sprouting front (Figure 1 – E-H). Furthermore, YAP is exclusively cytoplasmic in all areas of the retinal  
107 vasculature, with the exception of the sprouting front where some ECs express nuclear YAP, although at  
108 lower levels than in the cytoplasm. (Figure 1A'-D'). TAZ staining signal is very low in the remodelling  
109 plexus, arteries and veins (Figure 1 E'-H'); at the sprouting front, TAZ is strongly nuclear in numerous  
110 ECs (Figure 1 E, green arrowheads and E'), and both nuclear and cytoplasmic in others (Figure 1E, red  
111 arrowheads). The nuclear signal of YAP and TAZ did not correlate with a tip or stalk cell phenotype;  
112 nuclear YAP and TAZ are rather present in a subset of tip and stalk ECs at the sprouting front. YAP and  
113 TAZ were also found at endothelial adherens junctions in veins and in the remodelling plexus, (yellow  
114 arrowheads in Fig. 1D' and F'), as revealed by co-staining for VE-Cadherin (Figure 1 – Figure  
115 supplement 1). Together, these observations suggest that YAP/TAZ are abundant transcriptional co-  
116 activators in the endothelium, and dynamically regulated during the angiogenic process.

117

118 **YAP and TAZ are required for vessel growth, branching and regularity of the vasculature.**

119 To examine the cell-autonomous role of endothelial YAP and TAZ during angiogenesis we crossed mice  
120 bearing *floxed* alleles of *Yap* or *Taz* (17) with mice expressing a tamoxifen-inducible Cre recombinase  
121 driven by the endothelial-restricted *Pdgfb* promoter (*Pdgfb-iCreERT2*) (18). Injection of the offspring with  
122 tamoxifen induced loss of YAP and TAZ protein in ECs during post-natal vascular development, as  
123 evidenced by immunofluorescence staining (Figure 2 – Figure supplement 1). Cre negative littermate  
124 mice were used as controls.

125 Endothelial deletion of YAP or TAZ led to mild vascular defects (Figure 2A,B,C,D). *Yap*<sup>fl/fl</sup>  
126 *Pdgfb-iCreERT2* mice (*Yap* iEC-KO) presented reduced radial expansion of the vasculature (7% +/- 5.4  
127 reduction,  $p=0.0123$ ) and reduced vessel density (9% +/- 4.4 reduction,  $p=0.0002$ ) (Figure 2G,H). *Taz*<sup>fl/fl</sup>  
128 *Pdgfb-iCreERT2* mice (*Taz* iEC-KO) did not show altered radial expansion but displayed decreased  
129 vessel density (6% +/- 5.8 reduction,  $p=0.0214$ ) (Figure 2H). Neither mutant showed a change in the  
130 branching frequency of vessels (Figure 2I). Interestingly, in *Yap* iEC-KO retinas the expression of TAZ  
131 was increased and TAZ more often localised to the nucleus (Figure 2 – Figure supplement 2),  
132 suggesting compensatory regulation. *Taz* iEC-KO retinas did not however show a clear difference in  
133 YAP expression (data not shown). Deleting both proteins in compound mutant mice (*Yap*<sup>fl/fl</sup> *Taz*<sup>fl/fl</sup> *Pdgfb-*  
134 *iCreERT2*, *YapTaz* iEC-KO) produced a dramatic defect in blood vessel development (Figure 2E,F): the  
135 retinal vasculature showed a 21% (+/-14,  $p=0.0012$ ) decrease in radial expansion (Figure 2G), a 26%  
136 (+/- 7.0,  $p<0.0001$ ) decrease in capillary density (Figure 2H), and a 55% (+/- 15.4,  $p<0.0001$ ) decrease  
137 in branching frequency (Figure 2I). Interestingly, the vessel loops were not only bigger in *Yap/Taz* iEC-  
138 KO mice (Figure 2J), but also more variable in size (Figure 2K), and shape (Figure 2L) than in control  
139 mice. These results indicate that endothelial YAP and TAZ are critical for the development of a  
140 homogeneous blood vessel network and can perform redundant functions in the endothelium.

141

142 **YAP and TAZ are required for endothelial cell proliferation in response to mechanical stretch.**

143 As YAP and TAZ display pro-proliferative and anti-apoptotic roles in many cell types (3, 4), we evaluated  
144 whether the reduced vascularization of *Yap/Taz* iEC-KO retinas was associated with reduced cell  
145 proliferation or increased apoptosis. EC proliferation, assessed by EdU staining (Figure 3A-C), was  
146 decreased in *Yap* iEC-KO retinas (23% +/- 10.0,  $p=0.0469$ ), whilst not affected in *Taz* iEC-KO.  
147 Consistent with our prior results the decrease in cell proliferation was strongest in *Yap/Taz* iEC-KO  
148 retinas (33% +/- 26.0,  $p=0.0059$ ). Staining for cleaved caspase 3 revealed that apoptosis was unaltered  
149 by YAP/TAZ loss (Figure 3D-F).

150 To understand if YAP and TAZ were required for proliferation downstream of VEGF, we  
151 knocked down YAP and TAZ in human umbilical vein endothelial cells (HUVECs) using small interfering  
152 RNAs (siRNAs) (Figure 3 - Figure supplement 1) and measured the proliferation rate by flow cytometry  
153 after treatment with increasing concentrations of VEGF (Figure 3G). Interestingly, upon loss of YAP,  
154 TAZ or YAP/TAZ, ECs proliferated at similar or even increased rates compared to control cells.  
155 Furthermore, VEGF treatment did not alter the subcellular localisation of YAP and TAZ in HUVECs  
156 (Figure 3 – Figure supplement 2), suggesting that VEGF is not a primary regulator of their activity.

157 We next asked whether YAP and TAZ mediate endothelial proliferation in response to stretch –  
158 another crucial mitogenic stimulus for the endothelium (19). To this end, we subjected HUVECs to 24h  
159 of stretch and measured the proliferation rate in comparison to non-stretched, static cells treated with  
160 the same siRNAs, by EdU labelling (Figure 3H). Control cells responded to stretch with a 5-fold average  
161 increase in proliferation, and this effect was reduced upon knockdown of VE-Cadherin confirming  
162 previous observations (19). The knockdown of YAP and YAP/TAZ, but not TAZ alone, led to a decrease  
163 in stretch induced proliferation. Thus YAP is, similarly to VE-cadherin, required for endothelial cell  
164 proliferation in response to mechanical stimulation at cell-cell junctions.

165

#### 166 **YAP/TAZ loss leads to irregular endothelial cell distribution and haemorrhages.**

167 Further analysis of *Yap/Taz* iEC-KO retinas revealed severe defects at the sprouting front. *Yap/Taz* iEC-  
168 KO mutant retinas had 23% (+/- 12.3,  $p=0.0113$ ) fewer angiogenic sprouts than the control (Figure 4A,B  
169 yellow asterisks and Figure 4 - Figure supplement 1). Moreover, whereas control sprouts were  
170 elongated and showed long cellular protrusions towards the non vascularised front (Figure 4A'), sprouts  
171 in *Yap/Taz* iEC-KO retinas were rounder and lacked protrusions (Figure 4B'). The defective sprout  
172 morphology correlated with irregular spacing and frequent aggregations of ECs within the sprouts  
173 (Figure 4B'), arguing that migration and/or the rearrangement of ECs are perturbed in *Yap/Taz* mutant  
174 vessels. Additionally, the *Yap/Taz* iEC-KO vasculature displayed aberrant vessel crossings (Figure  
175 4C,C',C'',D,D',D''), suggesting that vessels may frequently have failed to anastomose or stabilize  
176 connections following sprouting, and instead passed each other. Interestingly, defects in cellular  
177 rearrangements, sprouting elongation and anastomosis have previously been associated with altered  
178 stability or dynamics of endothelial cell junctions (20-24). The defects in morphology were coupled to  
179 defects in function as *Yap/Taz* iEC-KO retinas displayed large haemorrhages from vessel sprouts at the  
180 angiogenic front (Figure 4E,E',F,F'), indicating loss of junctional integrity.

181 Together, these results argue against a cell proliferation defect being the only driver of the  
182 *Yap/Taz* iEC-KO phenotype and suggest that endothelial YAP/TAZ play a role in the regulation of ECs  
183 junctions.

184

185 **YAP/TAZ regulate adherens junction morphology and stability.**

186 Staining for VE-Cadherin revealed several junctional alterations in the vessels of *Yap/Taz* iEC-KO mice  
187 (Figure 4G-H). In control retinas, cell junctions were thin and mostly linear (Figure 4G'), while in *Yap/Taz*  
188 iEC-KO retinas ECs displayed tortuous junctions (Figure 4H'). VE-Cadherin staining also unveiled  
189 profound differences in the arrangement of ECs within vessels. In control retinas, ECs were arranged  
190 into multicellular tubes, highlighted by the presence of two or more VE-Cadherin junctions running  
191 longitudinally along the axis of the vessels (Figure 4G,G"). Some unicellular segments lacking VE-  
192 Cadherin staining could also be found and always correlated with decreasing calibre, indicative of  
193 regressing vessels (Figure 4G red arrowheads) (25). In contrast, in *Yap/Taz* iEC-KO retinas we  
194 observed many unicellular vessel segments lacking longitudinal VE-Cadherin junctions, but in vessels of  
195 normal calibre (Figure 4H, red arrowheads and H"). As junctional remodelling has been shown to be  
196 required for the cellular rearrangements that establish multicellular tubes (20), these results suggest that  
197 YAP and TAZ regulate junctional remodelling.

198

199 VE-Cadherin staining in HUVECs after YAP, TAZ and YAP/TAZ knockdown revealed altered  
200 junctional morphology. Interestingly, previous studies have correlated junctional morphology with cellular  
201 activities. *In vivo*, straight or linear junctions were associated with high Notch activity and stalk cell  
202 behaviour, while serrated junctions (also referred to as VE-Cadherin fingers) were found in tip cells or  
203 actively rearranging cells (21). *In vitro*, VE-Cadherin fingers were shown to steer migrating ECs and  
204 couple leader and follower cells (26), and have also been correlated with increased permeability in cell  
205 monolayers. More recently, junction associated intermediate lamellipodia have been associated with  
206 decreased permeability in cultured ECs (27).

207 To more accurately describe the differences in junctional morphology after YAP/TAZ  
208 knockdown, we defined five junctional categories (straight junctions, thick junctions, thick to reticular  
209 junctions, reticular junctions and fingers) (Figure 5E). Control cells showed mostly reticular junctions  
210 (Figure 5A,F). The knockdown of YAP and TAZ led to an increase in straight junctions and fingers,  
211 respectively (Figure 5B,C,F), whereas the combined knockdown of YAP/TAZ led to an increase in both  
212 straight junctions and fingers and to a loss of reticular junctions (Figure 5D,F). In addition, the



213 knockdown of YAP/TAZ led to junctional breaks in the monolayer, as seen by the presence of gaps in  
214 VE-Cadherin stainings (Figure 5D, red arrowheads). Together, these observations demonstrate that  
215 YAP and TAZ together are required for the formation of reticular junctions and inhibit the formation of  
216 straight junctions and fingers. Interestingly, however, they individually have distinct effects on adherens  
217 junction morphology.

218 To understand whether the shift in morphology translated into a functional defect we  
219 investigated the permeability of the monolayer to 250kDa dextran molecules. Only the combined  
220 knockdown of YAP/TAZ led to a significant increase in permeability in comparison to the control  
221 situation (Figure 5G), suggesting that YAP/TAZ are both required for the barrier function of the  
222 endothelium and can compensate for each other in this particular role.

223 The dynamic rearrangements of ECs during sprouting require that cell-cell junctions are  
224 constantly assembled, rearranged and disassembled. To understand whether YAP and TAZ regulate  
225 the turnover of cell junctions, we pulse-labeled VE-Cadherin molecules at cell junctions using an  
226 antibody directly coupled to a fluorescent dye for 30 minutes (Figure 5H-I) (28). The antibody was  
227 subsequently washed out and cells cultured for two more hours in normal conditions, before being fixed  
228 and stained for surface VE-Cadherin using a second fluorescent label. Comparing the two sequential  
229 VE-cadherin labels allowed us to distinguish junctions with high, intermediate and low turnover rates  
230 (Figure 5J). In control cells, 44% of patches were of high turnover junctions, 24% of intermediate  
231 turnover junctions and 32% of low turnover junctions (Figure 5K). The knockdown of YAP/TAZ  
232 significantly decreased the percentage of high turnover junctions to 14% ( $p=0.0387$ ) and increased the  
233 percentage of low turnover junctions to 58%. Interestingly, we found a correlation between the  
234 morphology of junctions and VE-Cadherin turnover rates (Figure 5L): straight junctions and fingers  
235 showed the lowest turnover rate, while reticular junctions showed the highest. To understand if the  
236 different VE-Cadherin turnover observed after knockdown of YAP/TAZ was caused by a shift in  
237 morphology, we compared the turnover of VE-Cadherin within the same morphological categories.  
238 Knockdown of YAP/TAZ decreased the percentage of high turnover junctions within all morphological  
239 categories, confirming a specific defect in VE-Cadherin turnover.

240 To test whether YAP and TAZ regulate the endocytosis of VE-Cadherin, we imaged  
241 intracellular VE-Cadherin vesicles after pulse labeling the molecule at the surface and allowing it to be  
242 endocytosed (Figure 5M,M',N,N'). However, the detectable amount of VE-cadherin vesicles after  
243 YAP/TAZ knockdown was unaffected. In order to challenge the stability of the junctions we triggered cell  
244 junction disruption by chelating extracellular calcium with EGTA (29) (Figure 5O,O',P,P'). Whereas VE-

245 cadherin accumulated in intracellular vesicles in control cells, after YAP/TAZ knockdown substantial  
246 amounts of VE-cadherin antibody remained at the cell junction, signifying reduced endocytosis. Thus,  
247 YAP/TAZ promote VE-Cadherin turnover and facilitate its dynamic recycling.

248 As cell junctions are essential for ECs to rearrange and migrate collectively (30), and *Yap/Taz*  
249 iEC-KO retinas presented less elongated sprouts suggestive of a migration defect, we asked whether  
250 cell migration was also regulated by YAP/TAZ.

251

### 252 **YAP/TAZ are required for individual endothelial cell migration.**

253 To address the requirement of YAP and TAZ for endothelial cell migration we performed a scratch-  
254 wound assay (Figure 6A-H). While in the control situation the wound was completely closed at 16h  
255 (Figure 6A,B,I), after knockdown of YAP less than 50% of the wound area was closed at the same time  
256 point ( $p=0.0067$ ) (Figure 6C,D,I). A stronger effect on endothelial cell migration was observed after the  
257 knockdown of TAZ and YAP/TAZ, with less than 20% of the wound area being closed at 16h ( $p=0.0006$   
258 for siTAZ vs siCTR and  $p=0.0013$  for siYAP+siTAZ vs siCTR) (Figure 6E,F,G,H,I).

259 Given that cells aggregated at the sprouting front of *Yap/Taz* iEC-KO retinas, we wondered  
260 whether in addition to defective directional cell migration they also lacked the ability to shuffle with the  
261 neighbouring cells. Recent data illustrated that collectively migrating ECs *in vitro* move in streams and  
262 swirls and display straight junctions along the lateral boundaries and fingers along the front and rear  
263 (26). To investigate collective cell migration we therefore analysed the arrangement of cells in a  
264 confluent monolayer (Figure 6 J-O). Control cells displayed a cobblestone appearance without  
265 identifiable subgroups of cells (Figure 6J). In contrast, after knockdown of YAP/TAZ cells adopted  
266 elongated shapes and arranged into streams and swirls (Figure 6K). To quantify this effect we used the  
267 longest axis of the EC nucleus as a proxy for the orientation of each cell and developed a measure of  
268 monolayer coordination based on the alignment of cells with their neighbours (Figure 6L,L',M,M', N). A  
269 score of 1 would signify parallel alignment between all cells, and a score of 0 random alignment of the  
270 population. Control cells displayed higher than random alignment with their closest neighbours, but cells  
271 beyond 300 $\mu$ m from each other were arranged at random (Figure 6I). While the knockdown of YAP did  
272 not affect the alignment score of cells, the knockdown of TAZ led to increased alignment. The combined  
273 knockdown of YAP/TAZ led to an even higher degree of coordination, with higher alignment scores  
274 across all distances between cells. These results suggest that YAP/TAZ promote the ability of cells to  
275 distribute individually within monolayers.

276

277 **Nuclear YAP and TAZ inhibit Notch and BMP signalling in endothelial cells.**

278 To gain insight into the nuclear function of YAP and TAZ, we generated a *Pdgfb-iCreERT2* -inducible  
279 TAZ gain-of-function mouse allele, in which a mutated version of TAZ (TAZ S89A) is introduced in the  
280 *Rosa26R* locus and expressed by a CAG promoter following Cre-mediated excision of an upstream stop  
281 codon (Figure 7 – Figure supplement 1). The TAZ S89A mutation results in enhanced nuclear  
282 localization of TAZ as it escapes phosphorylation by the upstream Hippo kinase LATS (31). The allele  
283 also expresses nuclear EGFP by means of an IRES sequence, allowing the identification of recombined  
284 cells expressing the TAZ mutant protein. *Taz* iEC-GOF retinas exhibited 25% increased sprouting (+/-  
285 12.2,  $p=0.0074$ ) (Figure 7A,B yellow asterisks and Figure 7C) and 19% increased branching (+/- 8.3,  
286  $p=0.0012$ ) (Figure 7D). Thus, driving nuclear TAZ expression, leads in many aspects to the opposite  
287 phenotype of *Yap/Taz* iEC-KO retinas, suggesting that the loss of the nuclear function of YAP/TAZ plays  
288 a key role in the development of the observed vascular loss-of-function phenotypes.

289 To elucidate the transcriptional targets of YAP and TAZ, we performed unbiased transcriptome  
290 analysis on HUVECs transduced with adenoviruses encoding for YAP and TAZ gain-of-function mutants  
291 or *GFP* as a control (AdYAP<sup>S127A</sup>, AdTAZ<sup>S89A</sup>, AdGFP) (Figure 7 – Figure supplement 2). Forced  
292 activation of YAP and TAZ led to congruent gene expression changes including the canonical YAP/TAZ  
293 target genes *CYR61*, *ANKRD1*, and *CTGF*, as expected. Interestingly, YAP and TAZ also suppressed  
294 numerous Notch and BMP target genes. During sprouting angiogenesis, Notch and BMP9/10 signalling  
295 restrict the acquisition of a tip cell phenotype by activated ECs (32-38). These results were confirmed by  
296 qRT-PCR analysis (Figure 7E): AdYAP<sup>S127A</sup> and AdTAZ<sup>S89A</sup> cells expressed significantly less *LFNG*,  
297 *DLL4* and *HES1* (Notch target genes), *SMAD6*, *UNC5B* and *ID1* (BMP target genes) and *HEY1* (a  
298 common Notch and BMP target gene) than control cells. Consistent with these findings, knockdown of  
299 YAP or TAZ lead to a substantial increase in Notch reporter activity (Figure 7 – Figure supplement 3A)  
300 and target gene expression (Figure 7F). Similar effects were observed for the BMP pathway (Figure 7 –  
301 Figure supplement 3B and Figure 7F), while TEAD-driven reporter activity and YAP/TAZ target genes  
302 were repressed (Figure 7 – Figure supplement 3C and Figure 7F).

303 To understand if Notch and BMP signalling were also affected *in vivo*, we stained *Yap/Taz* iEC-  
304 KO retinas for DLL4 and phospho-SMAD1/5/8. In control retinas, DLL4 expression was highest at the  
305 leading edge, decreasing over the first 100µm from the sprouting front, beyond which the expression  
306 was evenly low throughout the vessels in the plexus (Figure 7G,H and Figure 7 – Figure supplement 4).  
307 In *Yap/Taz* iEC-KO retinas the expression of DLL4 at the sprouting front was higher; additionally, the  
308 area of high DLL4 was broader, decreasing for up to 200µm from the sprouting front before flattening to

309 the lower levels of the plexus. Moreover, staining *Yap/Taz* iEC-KO retinas for pSMAD1/5/8 showed a  
310 ~10 fold increase in the number of ECs positive for pSMAD1/5/8 at the sprouting front ( $p < 0.0001$ )  
311 (Figure 7I,I', J, J',K).

312 Together, these results identify that endothelial YAP and TAZ repress Notch and BMP  
313 signalling during angiogenesis and retinal vascular expansion.

314

315

## 316 **DISCUSSION**

317 The present study aimed to provide a detailed understanding of the distribution and function of  
318 endothelial YAP and TAZ in angiogenesis. Our finding that YAP and TAZ were present in the nucleus of  
319 ECs at the sprouting front of developing vessels shows parallels with other cell types where nuclear  
320 YAP and TAZ are detected in actively proliferating areas of developing tissues. Interestingly, however,  
321 YAP and TAZ show distinct expression patterns in ECs, although these proteins show a high degree of  
322 redundancy in many other cell types. While TAZ was predominantly expressed in the sprouting front  
323 where it accumulated strongly in endothelial nuclei, YAP was mostly cytoplasmic both in the sprouting  
324 front and also in more mature, remodelling vessels. These data are in agreement with a role for YAP in  
325 vessel maintenance. Also in zebrafish, the loss of YAP did not impact vessel formation but led to vessel  
326 collapse and regression (14). Furthermore, in addition to nuclear and cytoplasmic YAP and TAZ, we  
327 also detected junctional localization of these proteins in retinal vessels. A previous study by Giampietro  
328 and colleagues (7) has shown that endothelial YAP associates with adherens junction proteins at stable  
329 junctions and that this prevents its nuclear accumulation and transcriptional activity. Whether this is also  
330 true for TAZ has previously not been addressed. A sequestration of YAP and TAZ either in the  
331 cytoplasm or bound to junctional proteins can potentially serve different and not necessarily mutually  
332 exclusive roles: preventing their nuclear activity, keeping a pool of protein ready to shuttle to the nucleus  
333 and drive gene expression, and having other cytoplasmic functions. It is not yet entirely clear what  
334 regulates the subcellular localisation of YAP and TAZ in the developing vasculature. ECs at the  
335 sprouting front and in more mature vessels have different adherens junctions, experience distinct levels  
336 of signalling from secreted angiogenic molecules and are exposed to different levels of shear stress by  
337 the blood. Adherens junctions in sprouting vessels undergo dynamic remodelling that accompanies  
338 endothelial cell shape changes and migration, in contrast to mature vessels where they appear more  
339 stable in terms of shape (21, 39). Endothelial YAP and TAZ relocate to the nucleus upon disruption of  
340 cell junctions or loss of VE-Cadherin (shown for YAP by Choi and colleagues (16) and confirmed in our

341 analysis also for TAZ, data not shown). Interestingly, we did not find junctional localisation of YAP or  
342 TAZ at the sprouting front, supporting the idea that more dynamic junctions fail to sequester YAP and  
343 TAZ away from the nucleus. Conceptually, these data would support the hypothesis that the subcellular  
344 localisation of YAP and TAZ in the vasculature is at least in part regulated by the maturation of adherens  
345 junctions. In zebrafish, Nakajima and colleagues (14) showed that YAP nuclear relocation correlated  
346 with lumenisation of sprouting vessels, and they attributed this to the effect of shear stress on YAP. In  
347 the mouse retina, hemodynamic fluid laws predict that vessels at the sprouting front experience very low  
348 levels of shear (40), arguing against YAP and TAZ being activated by shear in this model. Additionally,  
349 we found no difference in the subcellular localisation of YAP or TAZ between arteries and veins, i.e.  
350 vessels that experience distinct shear stress levels. However, it is possible that local and fast changes  
351 in shear stress levels are more relevant to regulate YAP and TAZ than sustained shear. In support of  
352 this idea, YAP and TAZ appear not to respond to 12 or 24h of laminar shear (41), but translocate to the  
353 nucleus after only 10 minutes of laminar shear (14). Finally, although VEGF, a pro-angiogenic molecule  
354 secreted by astrocytes at the avascular front, drives endothelial proliferation and migration, we found no  
355 evidence for VEGF induced YAP and TAZ nuclear translocation. Other pro-angiogenic molecules, either  
356 locally produced or blood-borne, could regulate endothelial YAP and TAZ during development; future  
357 work will help clarify these questions and how different chemical and mechanical stimuli come together  
358 to regulate YAP and TAZ.

359         The role of YAP in the development of the retinal vasculature has previously been studied by  
360 Choi and colleagues using intra-ocular injection of siRNAs (16). However, we observed that YAP and  
361 TAZ are also expressed in pericytes. Thus to address the cell autonomous role of YAP and TAZ we took  
362 advantage of an endothelial specific inducible Cre to inactivate YAP and/or TAZ genetically during  
363 angiogenesis. The mild phenotype of the single mutants in comparison to the drastic phenotype of the  
364 compound mutant indicates functional redundancy in the endothelium. The compound loss of  
365 endothelial YAP and TAZ leads in the mouse retina to a decrease in the radial expansion of vessels,  
366 vascular density, branching and sprouting. This phenotype could be a consequence of a decreased  
367 number of ECs caused by a proliferation defect (42). However, our further discovery that YAP and TAZ  
368 are required to establish homogeneity in the plexus and prevent cellular aggregations suggests that  
369 endothelial YAP/TAZ signalling is not only required to provide adequate number of cells but is also  
370 critically involved in ensuring adequate EC distribution. We propose that endothelial YAP/TAZ operate in  
371 several mechanisms that jointly establish a balance of the right number of endothelial cells in the right  
372 place. First, endothelial YAP/TAZ drive proliferation in response to mechanical stimulation at the cell-cell

373 junction, and not in response to VEGF. We propose that in this way endothelial YAP/TAZ provide a cell  
374 intrinsic mechanism of locally controlling cell densities, in contrast to growth factor mediated cell  
375 proliferation instructed by the surrounding tissue. Second, endothelial YAP/TAZ increase VE-Cadherin  
376 turnover at cell-cell junctions, which is essential for cells to rearrange. This corroborates recent findings  
377 in mouse hepatocytes where YAP antagonises adherens junction stability (43). The authors showed that  
378 YAP regulates hepatocyte adherens junctions in response to increased actomyosin contractility by  
379 increasing myosin II light chain gene expression. Accordingly, the transcriptional, nuclear role of YAP  
380 was required for junctional regulation. Together with our observations, these findings indicate the  
381 existence of a positive feedback loop where stable junctions sequester YAP and TAZ from the nucleus,  
382 therefore maintaining less junctional turnover, while remodelling junctions allow YAP and TAZ to  
383 relocate to the nucleus where they increase VE-Cadherin turnover. Our results also suggest that a high  
384 VE-Cadherin turnover at the sprouting front is required in order to maintain junctional integrity and  
385 prevent bleedings. Third, YAP/TAZ decrease cell-cell coupling and increase the ability of cells to migrate  
386 individually. Together, our results therefore identify a role for YAP/TAZ in promoting endothelial cellular  
387 rearrangements through the regulation of junctional turnover and collectiveness of cell migration.  
388 Conceptually, linking stretch induced proliferation to balance cell numbers with modulation of junctional  
389 turnover to facilitate cell rearrangements seems ideally suited to achieve the required balance of cell  
390 distribution for functional vascular patterning.

391         Molecularly, how YAP and TAZ affect this complex cell behavior is not clear. Our results  
392 identify that endothelial YAP/TAZ reduce the expression of Notch and BMP signaling in ECs.  
393 Interestingly, temporal fluctuations of Notch signalling in sprouting ECs are required for their shuffling  
394 behaviour in sprouting assays, and heterogeneity in the Notch-activation phase between contacting cells  
395 drives vessel branching (42). Given that YAP/TAZ dynamically shuttle between cytoplasm and nucleus,  
396 it is tempting to speculate that they may affect not only Notch-signalling levels, but also their dynamics.  
397 However, further work and new tools will be required to address these questions. On the other hand, the  
398 BMP9/10-Alk1 pathway has recently been proposed as an important driver of collective migration of ECs  
399 in particular in response to blood flow (44). Therefore, the newly identified roles of endothelial YAP/TAZ  
400 in regulating Notch and BMP signalling may prove critical for endothelial cell migration and  
401 rearrangements not only within new vascular sprouts, but also in already perfused vessels. Based on  
402 our current evidence, we propose that endothelial YAP/TAZ function as integrators of mechanical  
403 stimulation and Notch/BMP signaling to balance local cell densities and endothelial cell arrangements  
404 during sprouting angiogenesis.

405

406

## 407 MATERIAL AND METHODS

408

### 409 Mice and treatments

410 For loss of function experiments the following mouse strains were used: *Yap*<sup>fl/fl</sup> and *Taz*<sup>fl/fl</sup>(17), *Pdgfb-*  
411 *iCreERT2* (18). To generate a conditional TAZ gain-of-function mouse model, a cDNA coding for a  
412 3xFLAG-tagged human TAZ (*WWTR1*) carrying an alanine substitution at serine 89 (S89A)(45) was  
413 inserted into a *Rosa26* targeting vector downstream of the ubiquitous *CAG* promoter. The cDNA also  
414 included an internal ribosome entry sequence (*IRES*) and a *nuclear-localized enhanced green*  
415 *fluorescence protein (nEGFP)*(46) for monitoring transgene expression. To allow Cre-dependent  
416 expression of *3xFLAG-TAZ*<sup>S89A</sup> and of the EGFP reporter, a *floxed (loxP-flanked) transcriptional STOP*  
417 *cassette* was incorporated between the *3xFLAG-TAZ*<sup>S89A</sup>-*IRES-nEGFP* sequence and the *CAG*  
418 promoter. The linearized targeting vector was transfected into embryonic stem (ES) cells derived from  
419 C57BL/6 mice, and homologous recombinants were identified by Southern blotting analysis. Correctly  
420 targeted ES cells were implanted into foster mothers and resulting chimaeras bred to C57BL/6 mice to  
421 screen for germline transmission. The mouse model was developed together with genOway. The  
422 *Rosa26-3xFLAG-TAZ*<sup>S89A</sup>-*IRES-nEGFP* allele was kept heterozygous in the experimental studies.

423 Mice were maintained at the London Research Institute and at the Max Delbruck Center for  
424 Molecular Medicine (loss of function mice) and at the Max Planck Institute for Heart and Lung Research  
425 (gain of function mice) under standard husbandry conditions. To induce Cre-mediated recombination 4-  
426 hydroxytamoxifen (Sigma, 7904) was injected intraperitoneally (IP) (20  $\mu$ L/g of 1 mg/mL solution) at  
427 postnatal day 1 and day 3 and eyes were collected at P6. In all loss and gain of function experiments  
428 control animals were littermate animals without Cre expression. Male and female mice were used for the  
429 analysis.

430 For endothelial cell proliferation assessment in the retina, mouse pups were injected IP 2 hours  
431 before culling with 20  $\mu$ L/g of EdU solution (0.5 mg/mL; Thermo Fischer Scientific, C10340).

432

### 433 Cell culture

434 HUVECs from pooled donors (PromoCell) were cultured in EGM2-Bulletkit without antibiotics (Lonza)  
435 and used until passage 6. For YAP and TAZ gain of function experiments HUVECs were obtained from  
436 Lonza, cultured in endothelial basal medium (Lonza) supplemented with hydrocortisone (1  $\mu$ g ml<sup>-1</sup>),

437 bovine brain extract (12  $\mu\text{g ml}^{-1}$ ), gentamicin (50  $\mu\text{g ml}^{-1}$ ), amphotericin B (50  $\text{ng ml}^{-1}$ ), epidermal  
438 growth factor (10  $\text{ng ml}^{-1}$ ) and 10% fetal bovine serum (Life Technologies) and used until passage 4.

439 For knockdown experiments, HUVECs were transfected with SMARTpool: siGENOME siRNAs  
440 purchased from Dharmacon (Yap #M-012200-00-0005, Taz #M-016083-00-0005, VE-Cadherin # M-  
441 003641-01-0005 and non-targeting siRNA Pool 1 #D001206-13-05). Briefly, subconfluent (70-80%)  
442 HUVECs were transfected with 25 nM siRNA using Dharmafect 1 transfection reagent following the  
443 protocol from the manufacturer; transfection media was removed after 24h and experiments were  
444 routinely performed on the third day after transfection.

445 To activate YAP and TAZ signalling in ECs, FLAG-YAP<sup>S127A</sup>- or 3x-FLAG-TAZ<sup>S89A</sup>-encoding  
446 adenoviruses were generated in the adenoviral type 5 backbone lacking the E1/E3 genes (Vector  
447 Biolabs). GFP-encoding adenoviruses were used as a control. Infections were carried out by incubating  
448 sub-confluent HUVECs (70-80%) with starvation media (EBM containing 0.1% BSA) for 4 hours followed  
449 by the addition of adenoviral particles and polybrene (Santa Cruz). After 4 hours, HUVECs were washed  
450 with Hanks Buffer for at least five times and then cultured in complete EBM media with 10% FCS and  
451 supplements overnight. All experiments were performed 24 hours post transduction.

452

### 453 **Immunofluorescence staining**

454 To perform retina immunofluorescence, eyes were collected from postnatal day 6 mice and fixed in 4%  
455 PFA in PBS for 1h at 4C. Retinas were dissected in PBS and permeabilised/ blocked for 1h at room  
456 temperature in 1% BSA, 2% FBS, 0.5% Triton X100, 0.01% Na deoxycholate and 0,02% Na Azide in  
457 PBS. Primary and secondary antibodies were incubated overnight at 4C and for 2h at room temperature,  
458 respectively, both in 1:1 PBS: blocking buffer. Isolectin staining was performed overnight at 4C in Pblec  
459 after retinas were equilibrated for 1h in Pblec at room temperature. Retinas were post-stained fixed in  
460 2% PFA in PBS for 10 minutes. To mount the samples Vectashield mounting medium. (Vector Labs,  
461 H1000) or ProLong Gold (Thermo Fisher Scientific) was used. Imaging was done by laser scanning  
462 confocal microscopy (Carl Zeiss LSM700, LSM780 and Leica TCS SP8). Processing of samples was  
463 carried out in tissues from littermates under the same conditions.

464 For immunofluorescence in HUVECs, cells were grown in #1.5 coverslips coated with poly-  
465 lysine and gelatin 0.2%. At the end of the experiment cells were fixed in 4% PFA for 10min,  
466 permeabilised in 0.3% Triton-X100 in blocking buffer for 5min and blocked in 1% BSA 20mM Glycine in  
467 PBS for 30 min. Primary and secondary antibodies were incubated for 2 and 1 hours, respectively, in



468 blocking buffer. Nuclei labeling was performed by incubating cells with DAPI for 5 min (Life technologies,  
469 D1306).

470 A list of the primary antibodies used can be found in Supplementary Table 1.

471

## 472 **Image analysis**

473 Analysis of radial expansion, capillary density, branching frequency, proliferating ECs, apoptosis and  
474 sprouting numbers was done using Fiji. Radial expansion corresponds to the mean distance from the  
475 optic nerve to the sprouting front (8 measurements in tilescans of two whole retinas per animal).  
476 Capillary density corresponds to the vessel area (measured by thresholding IB4 signal) divided by the  
477 field of view area (6–8 images of  $(425 \mu\text{m})^2$  between artery and vein per animal). Branching frequency  
478 was measured by manually counting all branching points in a field of view (4-5 images of  $(200 \mu\text{m})^2$   
479 between artery and vein per animal). The plexus regularity was assessed through the standard deviation  
480 of the size and the circularity of the vascular loops in the plexus (using same images as for analysis of  
481 capillary density). Vascular loops were segmented by thresholding the IB4 signal to avoid artifacts we  
482 excluded loops with a size smaller than  $86 \mu\text{m}^2$  for the analysis. Endothelial proliferation was  
483 measured by manually counting the number of EdU positive endothelial nuclei (ERG positive) and  
484 dividing by the vessel area (measured by thresholding IB4 signal) (4 images of  $(425 \mu\text{m})^2$  containing the  
485 sprouting front and localized on top of arteries per animal). Apoptosis was measured manually by  
486 counting the number of cleaved caspase 3 positive figures and dividing by the vessel area (measured by  
487 thresholding IB4 signal) (tilescan of one whole retina per animal). The number of sprouts was measured  
488 manually (3 images of  $425 \times 850 \mu\text{m}$  of the sprouting front per animal). To quantify DLL4 intensity the  
489 outline of the sprouting front and the position of the arteries were manually defined using IB4 staining.  
490 Vessels were segmented by thresholding the IB4 staining in Fiji. Then, DLL4 intensity inside the  
491 vasculature was normalised with the average DLL4 intensity outside of the vasculature. Subsequently,  
492 for every pixel inside the vasculature (excluding the arteries) the distance to the sprouting front was  
493 calculated. The normalised DLL4 values within each bin were averaged ( $15 \mu\text{m}$  bins from 0 to  $500 \mu\text{m}$ ).  
494 For each retina quarter a curve was obtained, and the average and SEM of these curves was shown in  
495 the graph (one retina quarter was used per animal). To quantify pSMAD1/5/8 status the number of  
496 pSMAD1/5/8 positive endothelial nuclei was manually counted and dividing by the total number of  
497 endothelial nuclei (defined by being ERG positive) (3 images of  $(225 \mu\text{m})^2$  containing the sprouting front  
498 were used per animal).

499 To analyse YAP/TAZ subcellular localisation in HUVECs we adapted a previously existing

500 cytoplasm-to-nucleus translocation assay pipeline from Cell Profiler (47). Briefly, YAP or TAZ staining  
501 intensity was measured both inside the nucleus of the cell and in a 12 pixels wide ring of cytoplasm  
502 grown radially from the nucleus. The nucleus localisation was determined using a DAPI mask. We  
503 calculated the ratio between the nucleus and cytoplasm intensity and categorised cells as having  
504 nuclear localisation, nuclear and cytoplasmic and cytoplasmic localisation when the ratio was >1.2,  
505 between 1.2 – 0.8 and <0.8 respectively.

506 Cell junction morphology analysis was done in confluent monolayers of HUVECs stained for  
507 VE-Cadherin. 5 morphological categories were defined: straight, thick, thick to reticular, reticular and  
508 fingers. We acquired 5 images of  $(160\mu\text{m})^2$  per condition per experiment, divided each image in  $(16$   
509  $\mu\text{m})^2$  patches, and randomly grouped these patches. The classification into categories was done  
510 manually and blindly for the condition.

511 To analyse cell coordination we used confluent cells labelled for DAPI. The nuclei were  
512 automatically segmented using a customized Python algorithm relying on the Scikit Image Library. By  
513 fitting an ellipse to each nucleus we obtained its major and minor axis, and the angle of the major axis  
514 with the x-axis of the image was assigned to the nucleus as its orientation. This way each nucleus in the  
515 images was assigned a position given by its midpoint and an orientation. Next we analyzed the average  
516 alignment of the nuclei of two cells depending on their distance. As the nuclei don't have a directionality  
517 (i.e. they are nematics as opposed to vectors), the angles between two nuclei range from 0  
518 corresponding to the nuclei being parallel, to  $\pi/2$  corresponding to them spanning a right angle. For any  
519 two cells in each image we calculated the angle and the Euclidean distance between them, and then we  
520 binned the cells depending on their distance. We introduced a parameter called 'alignment' which is 1 if  
521 all cells are perfectly aligned and 0 for a completely random distribution of cell orientations.

522

### 523 **VEGF treatment and YAP/TAZ staining**

524 Confluent HUVECs were maintained in VEGF free media for 24h. VEGF treatment was then performed  
525 for 6h with 0ng/mL, 4ng/mL, 20ng/mL or 100ng/mL of VEGF-165 (PreproTech, 450-32).  
526 Immunofluorescence staining and analysis of YAP and TAZ subcellular localisation was performed as  
527 above described.

528

### 529 **VEGF treatment and proliferation assessment**

530 Knockdown HUVECs were maintained in VEGF free media for 24h. VEGF treatment was then  
531 performed for 24h with 0ng/mL, 4ng/mL, 20ng/mL or 100ng/mL of VEGF-165. Cells were pelleted,

532 resuspended in 90% cold Methanol and stored at -20C° before further processing. Cells were then  
533 resuspended in Propidium Iodide/RNase staining solution (Cell signaling, 4087) for 30 minutes before  
534 cell cycle analysis by flow cytometry (LSRII, BD). Data was analysed using BD FACSDiva™ software.

535

### 536 **Mechanical stretch application and proliferation assessment**

537 HUVECs were plated on collagen I - 0.2% gelatine-coated Bioflex plates (BF-3001C, Flexcell  
538 International Corporation). Gene knockdown was preformed as previously described. Cells were  
539 incubated in transfection media for 24h, and allowed to recover in fresh complete media for 4h.  
540 Afterwards cells were incubated for 24h in serum starvation media (0,1%BSA in EBM2 pure media) to  
541 form a confluent, quiescent monolayer. Cyclic stretch (0.25Hz, 15% elongation) was then applied for  
542 24h using a Flexcell® FX-5000™ Tension System. Control cells were placed in the same incubator but  
543 not on the Flexcell® device (static conditions). EdU pulsing was performed after 20h of the 24h stretch  
544 period. At the end of the experiment cells were fixed in 4% PFA and EdU staining was performed  
545 according to the manufacturer's protocol (Click-It EdU C10337 Life Technologies). Nuclei were labelled  
546 with DAPI. Three regions of interested were acquired per sample in a Carl Zeiss LSM700 scanning  
547 confocal microscopes (Zeiss, Germany). Quantification of proliferation was done using a CellProfiler  
548 pipeline. Percentage of S phase cells was determined as percentage of EdU positive nuclei over the  
549 total number of nuclei.

550

### 551 **Permeability assay**

552 24h after siRNA transfection cells were re-plated into fibronectin coated Transwell® membranes (Costar  
553 3460) at confluence and incubated for 2 more days to stabilize cell junctions. On the third day after  
554 transfection 0.5mg/mL of 250kDa FITC Dextran in cell media (Sigma FD250) was added to the top well.  
555 Fluorescence on the bottom well was measured after 6h in a Gemini XPS fluorescent plate reader. In  
556 each experiment 3 wells were measured per condition.

557

### 558 **Pulse chase VE-Cadherin experiment for quantification of low, intermediate and high turnover** 559 **junctions**

560 Cells were labelled live with a non-blocking monoclonal antibody directed against extracellular VE-  
561 Cadherin and directly coupled with Alexa-Fluor647 (BD Pharmingen, #555661, 1:200) for 30 minutes.  
562 Cells were then washed 2x with PBS and incubated with complete media for additional 2 hours. Cells  
563 were fixed with 4% PFA and stained for VE-Cadherin (Santa Cruz Biotechnology, #6458, 1:200) with a

564 secondary antibody coupled with Alexa-Fluor-488. 5 (160 $\mu$ m)<sup>2</sup> images per condition per experiment  
565 were acquired in a Carl Zeiss LSM700 confocal laser scanning microscope using the same acquisition  
566 settings. Max projection of z stack and merging of channels was done in Fiji. Images were divided in (16  
567  $\mu$ m)<sup>2</sup> patches and the patches were randomly grouped. Patches were classified into a morphological  
568 category and into low, intermediate or high turnover categories, manually and blindly for the condition.

569

#### 570 **Pulse chase VE-Cadherin experiment and EGTA treatment**

571 Cells were labelled live with a non-blocking monoclonal antibody directed against extracellular VE-  
572 Cadherin and directly coupled with Alexa-Fluor647 (BD Pharmingen, #555661, 1:200) for 30 minutes.  
573 Cells were then washed 2x with PBS and incubated with 4mM EGTA or vehicle in complete media for  
574 30 minutes. Cells were fixed with 4% PFA and stained for VE-Cadherin (Santa Cruz Biotechnology,  
575 #6458, 1:200) with a secondary antibody coupled with Alexa-Fluor-488.

576

#### 577 **Scratch wound assay**

578 24h after siRNA transfection cells were re-plated into a scratch wound assay device (IBIDI). On the  
579 following day a cell free gap of 500 $\mu$ m was created by removing the insert of the device. Images were  
580 taken immediately after removing the insert (0h) and after 16h. The cell free area was measured in Fiji  
581 and used to calculate the percentage of wound closure at 16h.

582

#### 583 **RNA extraction and quantitative real time-polymerase chain reaction**

584 RNA was extracted using the RNeasy Mini Kit (Qiagen) according to the manufacturer's instructions. For  
585 HUVECs transfected with adenoviruses carrying *YAP* and *TAZ* gain of function mutations, 2 $\mu$ g of total  
586 RNA were reverse transcribed to cDNA using M-MLV reverse transcriptase (Invitrogen). For HUVECs  
587 transfected with siRNAs 90ng of RNA were reverse transcribed using RevertAid First Strand cDNA  
588 Synthesis Kit (ThermoFisher Scientific). qRT-PCR was performed using TaqMan reagents and probes  
589 (Applied Biosystems) (listed in Supplementary Table 2). qRT-PCR reactions were run on a StepOnePlus  
590 real-time PCR instrument (ThermoFisher Scientific) or Quant Studio 6 Flex (Applied Biosystems) and  
591 expression levels were normalised to human *ACTB* or human *HPRT1* using the 2deltaCT method.

592

#### 593 **Western blot**

594 Protein was extracted from HUVECs using M-PER protein extraction reagent with Halt Protease and  
595 Phosphatase inhibitors (Pierce). Proteins concentration was assessed using a BCA protein assay kit

596 (Pierce). Proteins were separated by SDS–PAGE and blotted onto nitrocellulose membranes (Bio-Rad).  
597 Membranes were probed with specific primary antibodies and then with peroxidase-conjugated  
598 secondary antibodies. The following antibodies were used: YAP 63.7 (Santa Cruz Biotechnology, sc-  
599 101199, 1:1000), GAPDH (Millipore, MAB374, 1:4000). The bands were visualized by  
600 chemiluminescence using an ECL detection kit (GE Healthcare) and a My ECL Imager (Thermo  
601 Scientific).

602

### 603 **Dual luciferase reporter assay**

604 Renilla-luciferase reporter assays for TEF-1 (48), RBPj (49), BRE (50, 51) and FOPflash (52)-Luciferase  
605 promoter activity were performed as follows: 48 hours after gene knockdown by siRNA HUVECs were  
606 cotransfected with 600 ng of Luciferase reporter gene construct and 300 ng of pRL-CMV (Promega)  
607 using Lipofectamine2000 and incubated for 4 hours. Cell extracts were prepared 72 hours post siRNA  
608 transfection and 24 hours post Luciferase reporter transfection, and luciferase activity was measured  
609 using a dual luciferase system as described (53). Experiments were carried out in duplicates and results  
610 were normalized to the correspondent FOPflash/Renilla measurement.

611

### 612 **Microarray and gene set enrichment analysis**

613 Microarray studies were performed as described(46). In brief, total RNA was extracted from HUVECs  
614 using the RNeasy kit (Qiagen) and RNA quality assessed with the 6000 nano kit and an Agilent  
615 Bioanalyser. RNA was labelled according to the Affymetrix Whole Transcript Sense Target Labeling  
616 protocol. Affymetrix GeneChip® Human Gene 2.0 ST arrays were hybridized and scanned using  
617 Affymetrix protocols. Data were analysed using the Affymetrix expression console using the RMA  
618 algorithm; statistical analysis was done using DNASTar Arraystar 11. Heat maps of gene signatures  
619 were plotted using RStudio, Inc.

620

### 621 **Statistical Analysis**

622 Statistical analyses were performed using GraphPad Prism software and statistical significance was  
623 determined using unpaired Student *t*-test. When technically possible the investigators were blinded to  
624 genotype during experiments and quantification.

625

626 **Author Contribution**

627 FN designed the study, performed experiments, analyzed the results and wrote the manuscript; AKB,  
628 YTO, ACV, AS and JRC performed experiments, analyzed the results and reviewed the manuscript; IH  
629 and EBK performed experiments; SA performed quantitative analysis and analyzed results; CAF  
630 provided critical feedback. HG and MP designed the study and wrote the manuscript.

631

632

633 **Acknowledgments**

634 We thank members of the Vascular Biology (Berlin) and Vascular Patterning (VIB – Leuven)  
635 Laboratories for helpful discussions. We thank the Cancer Research UK - London Research Institute  
636 and the Max Delbrück Center for Molecular Medicine Animal Facilities for animal care and technical  
637 support. We thank Dr. Axel Behrens for kindly providing the *Taz<sup>f/f</sup>* mice. We thank Dr. Walter Birchmeier  
638 and Dr. Daniel Besser for providing the Normalizer and BRE-luc reporter, Dr. Eric Sahai and Dr. Nic  
639 Tapon for providing the TEF1-reporter, and Dr. Michael Gotthardt and Dr. Michael Radke for access to  
640 the Flexcell® Tension System and technical assistance. We specially thank Dr. Veronique Gebala, Dr.  
641 Andre Rosa and Dr. Baptiste Coxam for helpful comments on the manuscript.

642 FN was financially supported by the Fundação para a Ciência e a Tecnologia (FCT), CRUK-  
643 CRICK and the MDC. ACV and AKB were supported by the DZHK (German Centre for Cardiovascular  
644 Research), AS was supported by the EMBO (European Molecular Biology Organization), JRC was  
645 supported by the FCT. CAF is supported by the FCT, EC-ERC Starting Grant, Portugal2020 program.  
646 MP is supported by the Max Planck Society, the ERC Starting Grant ANGIOMET, the Deutsche  
647 Forschungsgemeinschaft, the Excellence Cluster Cardiopulmonary System, the LOEWE grant Ub-Net,  
648 the DZHK, the Stiftung Charité and the EMBO Young Investigator Program. HG is supported by the  
649 DZHK and ERC Consolidator Grant Reshape 311719.

650

651

652 **Competing interests**

653 None.

654  
655

REFERENCES

- 656 1. Watson EC, Koenig MN, Grant ZL, Whitehead L, Trounson E, Dewson G, and Coultas L. Apoptosis  
657 regulates endothelial cell number and capillary vessel diameter but not vessel regression during  
658 retinal angiogenesis. *Development*. 2016;143(16):2973-82.
- 659 2. Phng LK, Potente M, Leslie JD, Babbage J, Nyqvist D, Lobov I, Ondr JK, Rao S, Lang RA, Thurston G,  
660 et al. Nrarp coordinates endothelial Notch and Wnt signaling to control vessel density in  
661 angiogenesis. *Dev Cell*. 2009;16(1):70-82.
- 662 3. Piccolo S, Dupont S, and Cordenonsi M. The biology of YAP/TAZ: hippo signaling and beyond.  
663 *Physiol Rev*. 2014;94(4):1287-312.
- 664 4. Meng Z, Moroishi T, and Guan KL. Mechanisms of Hippo pathway regulation. *Genes Dev*.  
665 2016;30(1):1-17.
- 666 5. Yu FX, Zhao B, and Guan KL. Hippo Pathway in Organ Size Control, Tissue Homeostasis, and  
667 Cancer. *Cell*. 2015;163(4):811-28.
- 668 6. Yu FX, Zhao B, Panupinthu N, Jewell JL, Lian I, Wang LH, Zhao J, Yuan H, Tumaneng K, Li H, et al.  
669 Regulation of the Hippo-YAP pathway by G-protein-coupled receptor signaling. *Cell*.  
670 2012;150(4):780-91.
- 671 7. Giampietro C, Disanza A, Bravi L, Barrios-Rodiles M, Corada M, Frittoli E, Savorani C, Lampugnani  
672 MG, Boggetti B, Niessen C, et al. The actin-binding protein EPS8 binds VE-cadherin and modulates  
673 YAP localization and signaling. *J Cell Biol*. 2015;211(6):1177-92.
- 674 8. Schlegelmilch K, Mohseni M, Kirak O, Pruszek J, Rodriguez JR, Zhou D, Kreger BT, Vasioukhin V,  
675 Avruch J, Brummelkamp TR, et al. Yap1 acts downstream of alpha-catenin to control epidermal  
676 proliferation. *Cell*. 2011;144(5):782-95.
- 677 9. Dupont S, Morsut L, Aragona M, Enzo E, Giulitti S, Cordenonsi M, Zanconato F, Le Digabel J, Forcato  
678 M, Bicciato S, et al. Role of YAP/TAZ in mechanotransduction. *Nature*. 2011;474(7350):179-83.
- 679 10. Aragona M, Panciera T, Manfrin A, Giulitti S, Michielin F, Elvassore N, Dupont S, and Piccolo S. A  
680 mechanical checkpoint controls multicellular growth through YAP/TAZ regulation by actin-  
681 processing factors. *Cell*. 2013;154(5):1047-59.
- 682 11. Yu FX, and Guan KL. The Hippo pathway: regulators and regulations. *Genes Dev*. 2013;27(4):355-  
683 71.
- 684 12. Zhang L, Yang S, Chen X, Stauffer S, Yu F, Lele SM, Fu K, Datta K, Palermo N, Chen Y, et al. The hippo  
685 pathway effector YAP regulates motility, invasion, and castration-resistant growth of prostate  
686 cancer cells. *Mol Cell Biol*. 2015;35(8):1350-62.
- 687 13. Lin C, Yao E, Zhang K, Jiang X, Croll S, Thompson-Peer K, and Chuang PT. YAP is essential for  
688 mechanical force production and epithelial cell proliferation during lung branching  
689 morphogenesis. *Elife*. 2017;6{
- 690 14. Nakajima H, Yamamoto K, Agarwala S, Terai K, Fukui H, Fukuhara S, Ando K, Miyazaki T, Yokota Y,  
691 Schmelzer E, et al. Flow-Dependent Endothelial YAP Regulation Contributes to Vessel  
692 Maintenance. *Dev Cell*. 2017;40(6):523-36 e6.
- 693 15. Zhang H, von Gise A, Liu Q, Hu T, Tian X, He L, Pu W, Huang X, He L, Cai CL, et al. Yap1 is required  
694 for endothelial to mesenchymal transition of the atrioventricular cushion. *J Biol Chem*.  
695 2014;289(27):18681-92.

- 696 16. Choi HJ, Zhang H, Park H, Choi KS, Lee HW, Agrawal V, Kim YM, and Kwon YG. Yes-associated  
697 protein regulates endothelial cell contact-mediated expression of angiopoietin-2. *Nat Commun.*  
698 2015;6(6943).
- 699 17. Gruber R, Panayiotou R, Nye E, Spencer-Dene B, Stamp G, and Behrens A. YAP1 and TAZ Control  
700 Pancreatic Cancer Initiation in Mice by Direct Up-regulation of JAK-STAT3 Signaling.  
701 *Gastroenterology.* 2016;151(3):526-39.
- 702 18. Claxton S, Kostourou V, Jadeja S, Chambon P, Hovalva-Dilke K, and Fruttiger M. Efficient, inducible  
703 Cre-recombinase activation in vascular endothelium. *Genesis.* 2008;46(2):74-80.
- 704 19. Liu WF, Nelson CM, Tan JL, and Chen CS. Cadherins, RhoA, and Rac1 are differentially required for  
705 stretch-mediated proliferation in endothelial versus smooth muscle cells. *Circ Res.*  
706 2007;101(5):e44-52.
- 707 20. Sauteur L, Krudewig A, Herwig L, Ehrenfeuchter N, Lenard A, Affolter M, and Belting HG. Cdh5/VE-  
708 cadherin promotes endothelial cell interface elongation via cortical actin polymerization during  
709 angiogenic sprouting. *Cell Rep.* 2014;9(2):504-13.
- 710 21. Bentley K, Franco CA, Philippides A, Blanco R, Dierkes M, Gebala V, Stanchi F, Jones M, Aspalter IM,  
711 Cagna G, et al. The role of differential VE-cadherin dynamics in cell rearrangement during  
712 angiogenesis. *Nat Cell Biol.* 2014;16(4):309-21.
- 713 22. Giannotta M, Trani M, and Dejana E. VE-cadherin and endothelial adherens junctions: active  
714 guardians of vascular integrity. *Dev Cell.* 2013;26(5):441-54.
- 715 23. Lenard A, Ellertsdottir E, Herwig L, Krudewig A, Sauteur L, Belting HG, and Affolter M. In vivo  
716 analysis reveals a highly stereotypic morphogenetic pathway of vascular anastomosis. *Dev Cell.*  
717 2013;25(5):492-506.
- 718 24. Dejana E, Orsenigo F, and Lampugnani MG. The role of adherens junctions and VE-cadherin in the  
719 control of vascular permeability. *J Cell Sci.* 2008;121(Pt 13):2115-22.
- 720 25. Franco CA, Jones ML, Bernabeu MO, Geudens I, Mathivet T, Rosa A, Lopes FM, Lima AP, Ragab A,  
721 Collins RT, et al. Dynamic endothelial cell rearrangements drive developmental vessel regression.  
722 *PLoS Biol.* 2015;13(4):e1002125.
- 723 26. Hayer A, Shao L, Chung M, Joubert LM, Yang HW, Tsai FC, Bisaria A, Betzig E, and Meyer T. Engulfed  
724 cadherin fingers are polarized junctional structures between collectively migrating endothelial  
725 cells. *Nat Cell Biol.* 2016;18(12):1311-23.
- 726 27. Breslin JW, Zhang XE, Worthylake RA, and Souza-Smith FM. Involvement of local lamellipodia in  
727 endothelial barrier function. *PLoS One.* 2015;10(2):e0117970.
- 728 28. Dorland YL, Malinova TS, van Stalborch AM, Grieve AG, van Geemen D, Jansen NS, de Kreuk BJ,  
729 Nawaz K, Kole J, Geerts D, et al. The F-BAR protein pacsin2 inhibits asymmetric VE-cadherin  
730 internalization from tensile adherens junctions. *Nat Commun.* 2016;7(12210).
- 731 29. Yamamoto H, Ehling M, Kato K, Kanai K, van Lessen M, Frye M, Zeuschner D, Nakayama M,  
732 Vestweber D, and Adams RH. Integrin beta1 controls VE-cadherin localization and blood vessel  
733 stability. *Nat Commun.* 2015;6(6429).
- 734 30. Vitorino P, and Meyer T. Modular control of endothelial sheet migration. *Genes Dev.*  
735 2008;22(23):3268-81.
- 736 31. Varelas X, Samavarchi-Tehrani P, Narimatsu M, Weiss A, Cockburn K, Larsen BG, Rossant J, and  
737 Wrana JL. The Crumbs complex couples cell density sensing to Hippo-dependent control of the  
738 TGF-beta-SMAD pathway. *Dev Cell.* 2010;19(6):831-44.



- 739 32. Hellstrom M, Phng LK, Hofmann JJ, Wallgard E, Coultas L, Lindblom P, Alva J, Nilsson AK, Karlsson  
740 L, Gaiano N, et al. Dll4 signalling through Notch1 regulates formation of tip cells during  
741 angiogenesis. *Nature*. 2007;445(7129):776-80.
- 742 33. Lobov IB, Renard RA, Papadopoulos N, Gale NW, Thurston G, Yancopoulos GD, and Wiegand SJ.  
743 Delta-like ligand 4 (Dll4) is induced by VEGF as a negative regulator of angiogenic sprouting. *Proc*  
744 *Natl Acad Sci U S A*. 2007;104(9):3219-24.
- 745 34. Suchting S, Freitas C, le Noble F, Benedito R, Breant C, Duarte A, and Eichmann A. The Notch ligand  
746 Delta-like 4 negatively regulates endothelial tip cell formation and vessel branching. *Proc Natl*  
747 *Acad Sci U S A*. 2007;104(9):3225-30.
- 748 35. Siekmann AF, and Lawson ND. Notch signalling and the regulation of angiogenesis. *Cell Adh Migr*.  
749 2007;1(2):104-6.
- 750 36. David L, Mallet C, Keramidas M, Lamande N, Gasc JM, Dupuis-Girod S, Plauchu H, Feige JJ, and Bailly  
751 S. Bone morphogenetic protein-9 is a circulating vascular quiescence factor. *Circ Res*.  
752 2008;102(8):914-22.
- 753 37. Larrivee B, Prahst C, Gordon E, del Toro R, Mathivet T, Duarte A, Simons M, and Eichmann A. ALK1  
754 signaling inhibits angiogenesis by cooperating with the Notch pathway. *Dev Cell*. 2012;22(3):489-  
755 500.
- 756 38. Laux DW, Young S, Donovan JP, Mansfield CJ, Upton PD, and Roman BL. Circulating Bmp10 acts  
757 through endothelial Alk1 to mediate flow-dependent arterial quiescence. *Development*.  
758 2013;140(16):3403-12.
- 759 39. Betz C, Lenard A, Belting HG, and Affolter M. Cell behaviors and dynamics during angiogenesis.  
760 *Development*. 2016;143(13):2249-60.
- 761 40. Bernabeu MO, Jones ML, Nielsen JH, Kruger T, Nash RW, Groen D, Schmieschek S, Hetherington J,  
762 Gerhardt H, Franco CA, et al. Computer simulations reveal complex distribution of haemodynamic  
763 forces in a mouse retina model of angiogenesis. *J R Soc Interface*. 2014;11(99).
- 764 41. Wang KC, Yeh YT, Nguyen P, Limquenco E, Lopez J, Thorossian S, Guan KL, Li YJ, and Chien S. Flow-  
765 dependent YAP/TAZ activities regulate endothelial phenotypes and atherosclerosis. *Proc Natl*  
766 *Acad Sci U S A*. 2016;113(41):11525-30.
- 767 42. Ubezio B, Blanco RA, Geudens I, Stanchi F, Mathivet T, Jones ML, Ragab A, Bentley K, and Gerhardt  
768 H. Synchronization of endothelial Dll4-Notch dynamics switch blood vessels from branching to  
769 expansion. *Elife*. 2016;5(
- 770 43. Bai H, Zhu Q, Surcel A, Luo T, Ren Y, Guan B, Liu Y, Wu N, Joseph NE, Wang TL, et al. Yes-associated  
771 protein impacts adherens junction assembly through regulating actin cytoskeleton organization.  
772 *Am J Physiol Gastrointest Liver Physiol*. 2016;311(3):G396-411.
- 773 44. Rochon ER, Menon PG, and Roman BL. Alk1 controls arterial endothelial cell migration in  
774 lumenized vessels. *Development*. 2016;143(14):2593-602.
- 775 45. Varelas X, Sakuma R, Samavarchi-Tehrani P, Peerani R, Rao BM, Dembowy J, Yaffe MB, Zandstra  
776 PW, and Wrana JL. TAZ controls Smad nucleocytoplasmic shuttling and regulates human  
777 embryonic stem-cell self-renewal. *Nat Cell Biol*. 2008;10(7):837-48.
- 778 46. Murtaugh LC, Stanger BZ, Kwan KM, and Melton DA. Notch signaling controls multiple steps of  
779 pancreatic differentiation. *Proc Natl Acad Sci U S A*. 2003;100(25):14920-5.
- 780 47. Carpenter AE, Jones TR, Lamprecht MR, Clarke C, Kang IH, Friman O, Guertin DA, Chang JH,  
781 Lindquist RA, Moffat J, et al. CellProfiler: image analysis software for identifying and quantifying  
782 cell phenotypes. *Genome Biol*. 2006;7(10):R100.

- 783 48. Mahoney WM, Jr., Hong JH, Yaffe MB, and Farrance IK. The transcriptional co-activator TAZ  
784 interacts differentially with transcriptional enhancer factor-1 (TEF-1) family members. *Biochem J.*  
785 2005;388(Pt 1):217-25.
- 786 49. Jarriault S, Brou C, Logeat F, Schroeter EH, Kopan R, and Israel A. Signalling downstream of  
787 activated mammalian Notch. *Nature.* 1995;377(6547):355-8.
- 788 50. Korchynskiy O, and ten Dijke P. Identification and functional characterization of distinct critically  
789 important bone morphogenetic protein-specific response elements in the Id1 promoter. *J Biol*  
790 *Chem.* 2002;277(7):4883-91.
- 791 51. Fritzmann J, Morkel M, Besser D, Budczies J, Kosel F, Brembeck FH, Stein U, Fichtner I, Schlag PM,  
792 and Birchmeier W. A colorectal cancer expression profile that includes transforming growth factor  
793 beta inhibitor BAMBI predicts metastatic potential. *Gastroenterology.* 2009;137(1):165-75.
- 794 52. Korinek V, Barker N, Morin PJ, van Wichen D, de Weger R, Kinzler KW, Vogelstein B, and Clevers H.  
795 Constitutive transcriptional activation by a beta-catenin-Tcf complex in APC-/- colon carcinoma.  
796 *Science.* 1997;275(5307):1784-7.
- 797 53. Hampf M, and Gossen M. A protocol for combined Photinus and Renilla luciferase quantification  
798 compatible with protein assays. *Anal Biochem.* 2006;356(1):94-9.  
799  
800

Figure 1

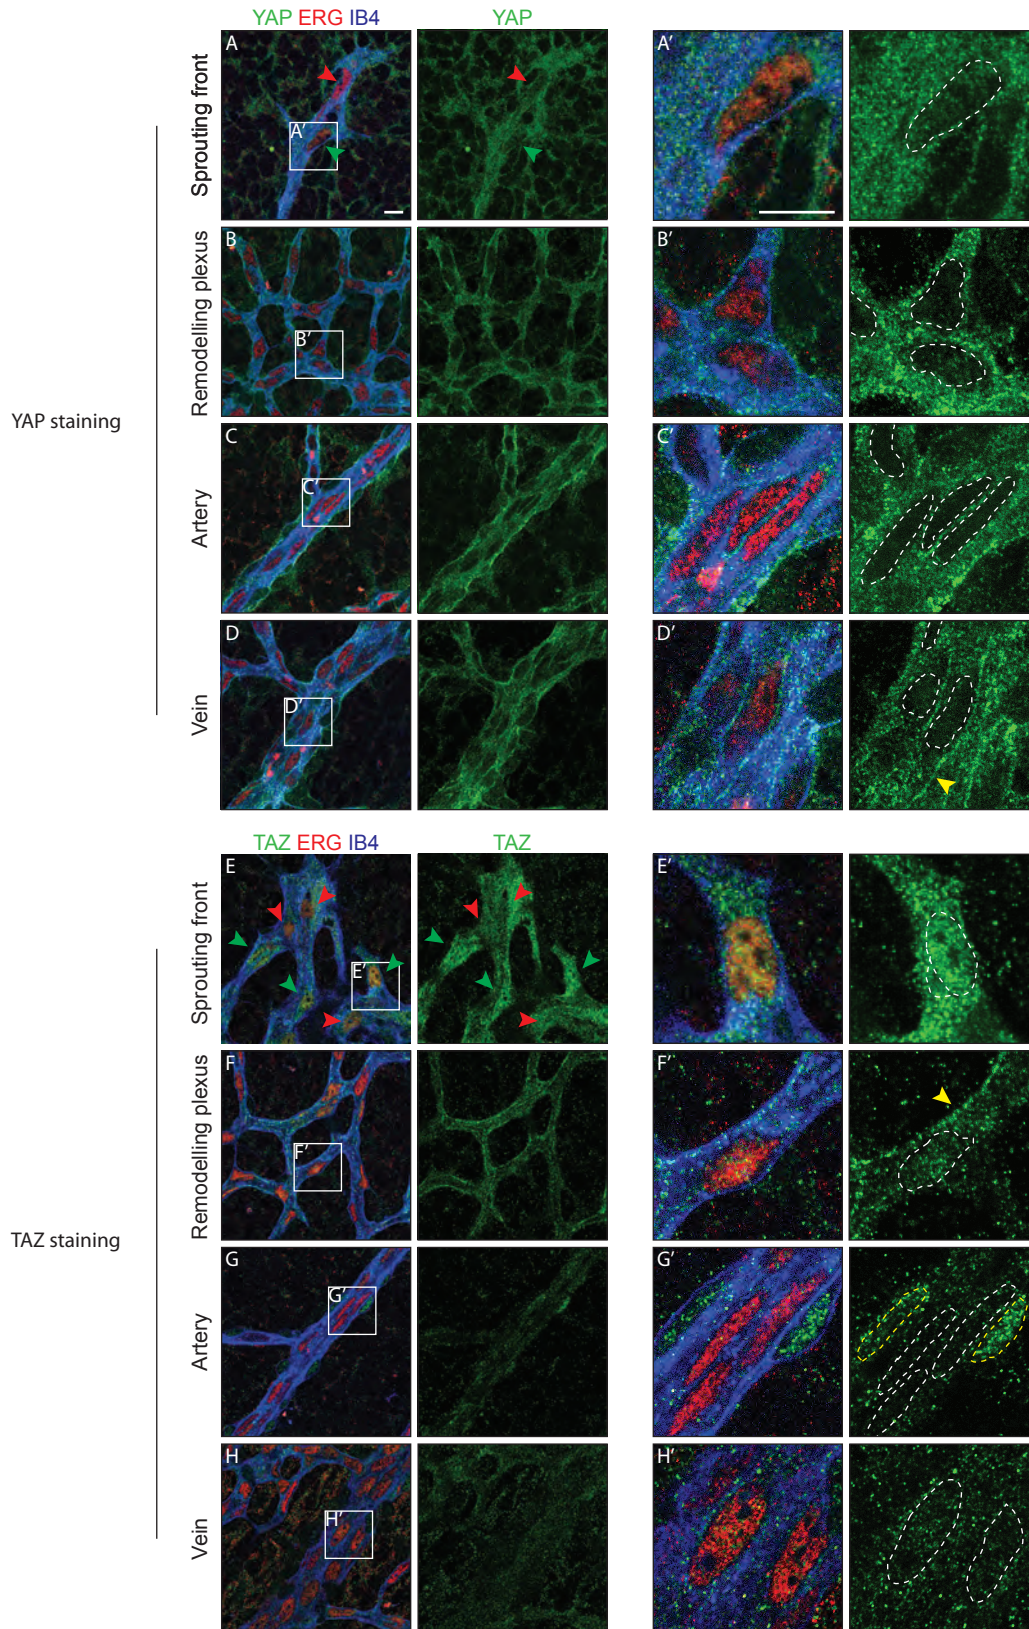

**Figure 1. YAP and TAZ are expressed throughout the vasculature of developing mouse retinas, and localise to the nucleus of sprouting endothelial cells.**

Immunofluorescence staining of YAP (green, A-D and A'-D') and TAZ (green, E-H and E'-H') was performed in wild-type mouse retinas at post-natal day 6 (P6). Retinas were co-stained with the endothelial membrane marker Isolectin-B4 (IB4; blue) and with antibodies against the endothelial nuclei marker ERG (red). White dotted lines, outline of endothelial nuclei. Yellow dotted lines, outline of perivascular cells' nuclei. Green arrowheads, nuclear localisation of YAP and TAZ. Red arrowheads, cytoplasmic localisation of YAP and TAZ. Yellow arrowheads, junctional localisation of YAP and TAZ. Images correspond to single confocal planes. Scale bar: 10µm.

Figure 1 - Figure Supplement 1

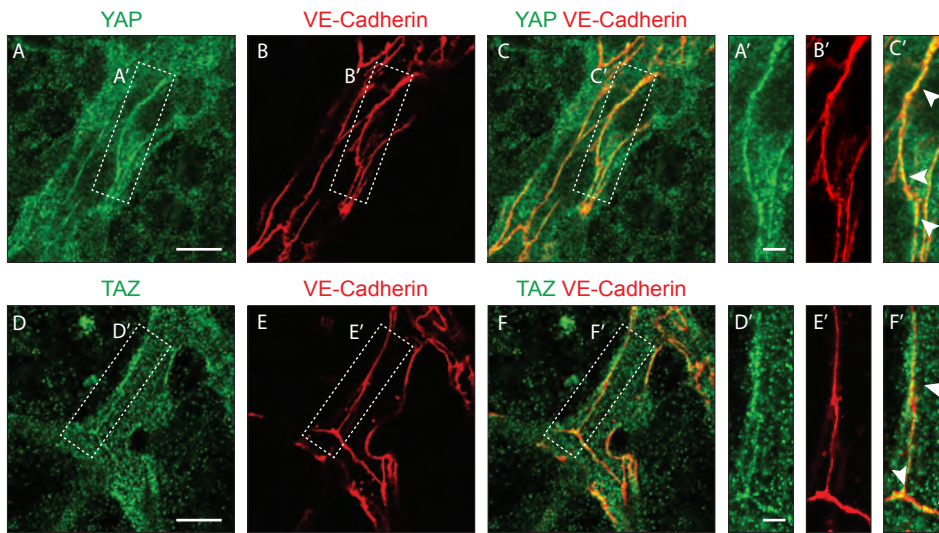

**Figure 1 - Figure supplement 1. YAP and TAZ localise at endothelial adherens junctions in the mouse retina.**

Immunofluorescence stainings of YAP (green, A-C, A'-C'), TAZ (green, D-F, D'-F') and VE-Cadherin (red, B, E, B', E') were performed in wild-type mouse retinas at P6. Arrows, co-localisation of YAP or TAZ with VE-Cadherin. Images correspond to single confocal planes. Scale bar A-C and D-F 10 $\mu$ m, A'-C' and D'-F' 3 $\mu$ m.

Figure 2

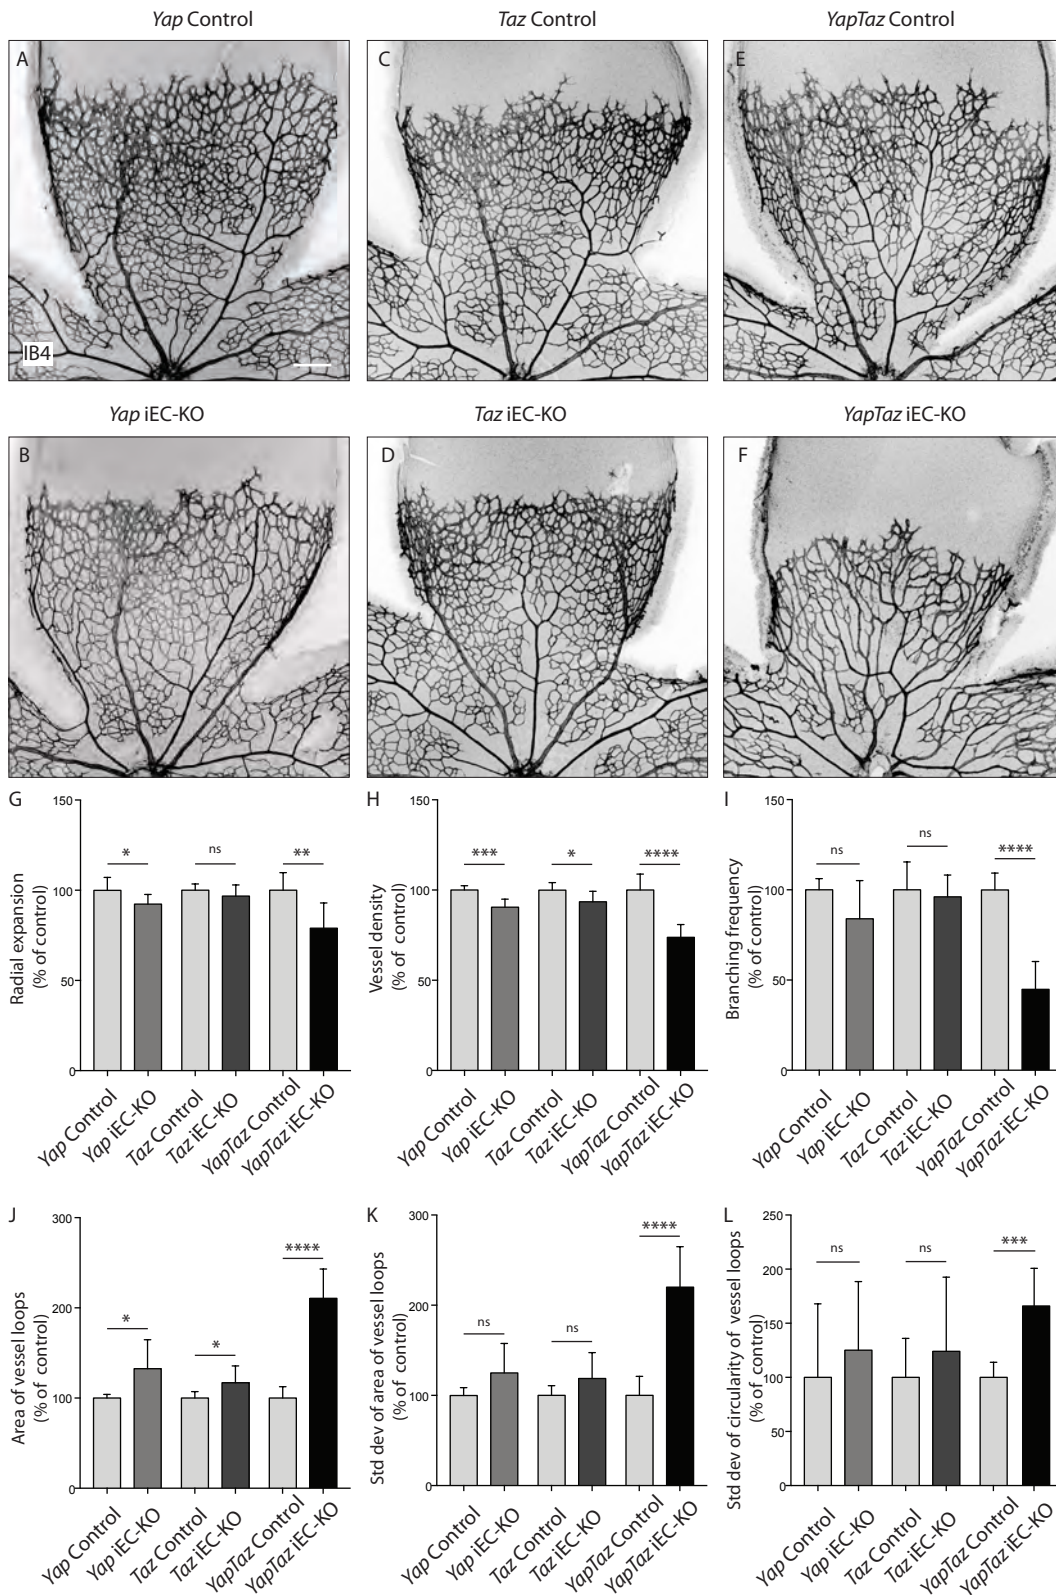

Figure 2 - Figure supplement 1

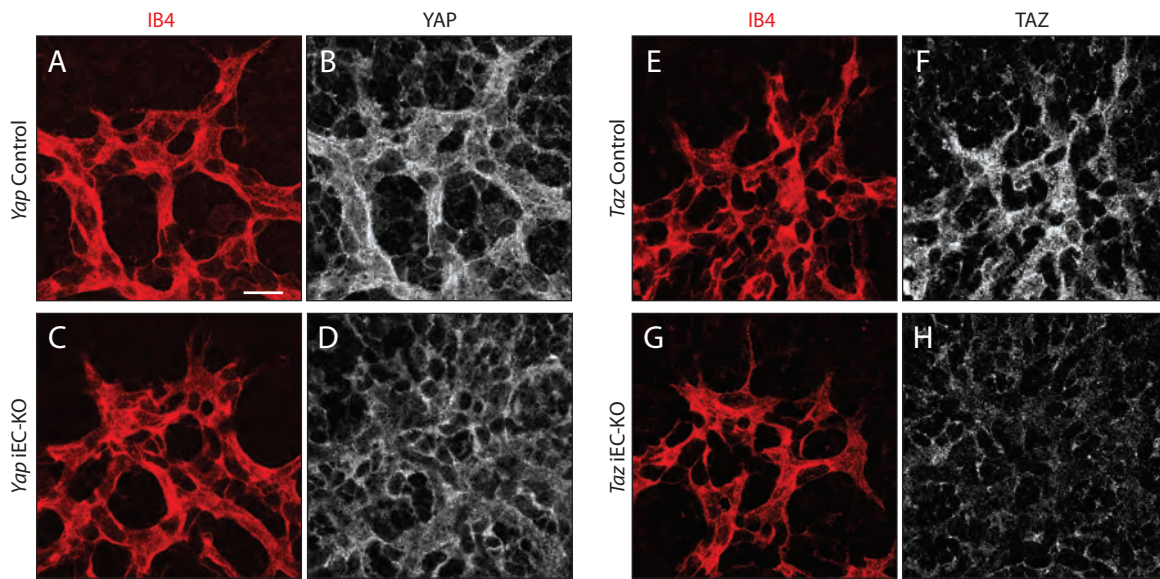

**Figure 2 – Figure supplement 1. YAP and TAZ proteins are lost upon Cre-mediated genetic deletion in P6 mouse retinas.**

*Yap* iEC-KO (*Yap*<sup>fl/fl</sup> *Pdgfb-iCreERT2*<sup>+/wt</sup>), *Taz* iEC-KO (*Taz*<sup>fl/fl</sup> *Pdgfb-iCreERT2*<sup>+/wt</sup>) and respective littermate control mice (*Yap*Control, *Yap*<sup>fl/fl</sup> and *Taz*Control, *Taz*<sup>fl/fl</sup>) were injected with tamoxifen at P1 and P3. At P6, mouse retinas were stained for YAP (grey, B,D), TAZ (grey, F,H), and with Isolectin B4 (IB4; red, A,C,E,G). Scale bar: 20 $\mu$ m.

Figure 2 - Figure supplement 2

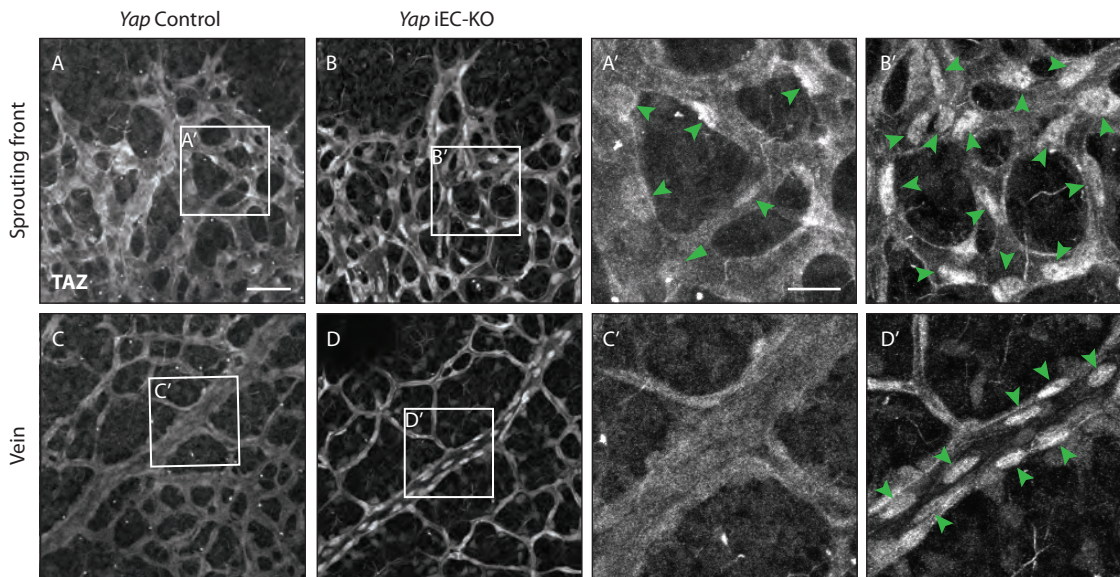

**Figure 2 – Figure supplement 2. TAZ compensates for the loss of YAP in endothelial cells *in vivo*.**

Retinas from P6 *Yap* iEC-KO (B,D and B',D') and littermate controls (A,C and A', C') were immunostained for TAZ. Green arrowheads, nuclear Taz. A,B, A',B' images correspond to maximum projection of z stack. C,D,C',D' correspond to single confocal planes. Scale bar: A-D 50 $\mu$ m, A'-D' 20 $\mu$ m.

Figure 3

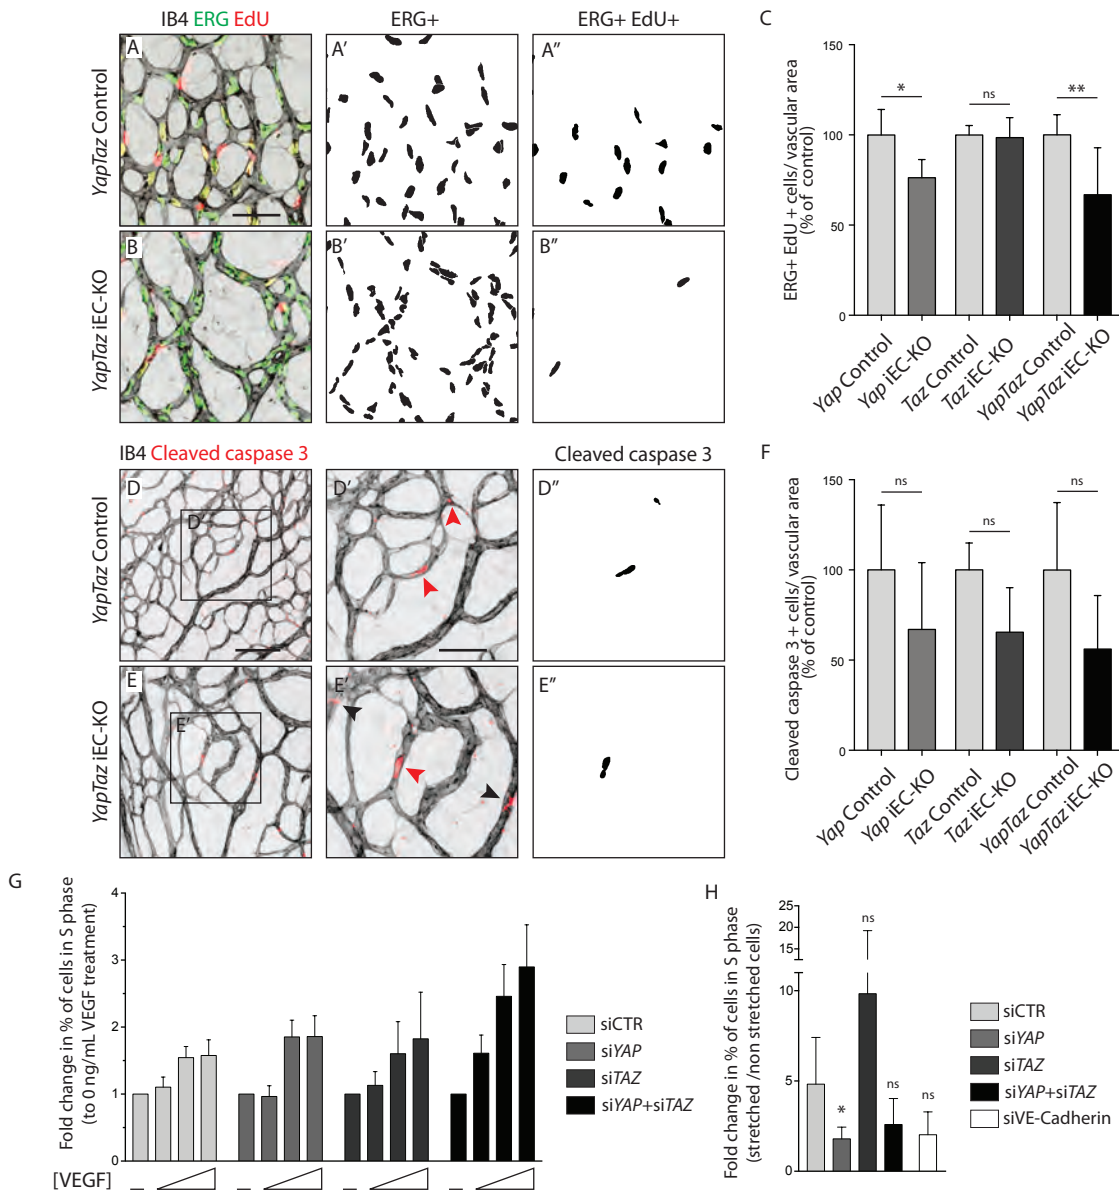

**Figure 3. YAP and TAZ are required for endothelial cell proliferation *in vivo* and endothelial cell proliferation in response to mechanical stretch *in vitro*.**

**A,B**, P6 retinal vessels labelled with IB4 (grey) and stained for EdU (red, marking S phase positive cells) and Erg (green, marking endothelial nuclei) in *YapTaz* iEC-KO (**B**) and littermate control mice (**A**). **A',B'**, mask of Erg + cells indicating endothelial nuclei. **A'', B''**, mask of Erg + and EdU + cells indicating proliferating endothelial cells. **C**, Quantification of endothelial proliferation in *Yap* iEC-KO (n=3 control/4 KO pups), *Taz* iEC-KO (n=5 control/5 KO pups) and *YapTaz* iEC-KO (n=8 control/7 KO pups). Number of EdU-positive and ERG-positive cells per IB4 labelled vascular area was calculated for each genotype and results are shown in percentage of the respective controls. Data are mean +/- SD. *p* values were calculated using unpaired *t*-test. ns, *p*>0.05; \*, *p*<0.05; \*\*, *p*<0.01. Scale bar: 50µm.

**D,E**, P6 retinal vessels labelled with IB4 (grey) and stained for cleaved caspase 3 (red) in *YapTaz* iEC-KO (**E**) and littermate control mice (**D**). **D', E'**, magnification of boxed area in D,E. Red arrowheads, cleaved caspase 3 positive endothelial cell. Black arrowheads, cleaved caspase 3 outside vessels. **D'', E''**, mask of cleaved caspase 3 positive endothelial cells. **F**, quantification of endothelial apoptosis in *Yap* iEC-KO (n=7 control/7 KO pups), *Taz* iEC-KO (n= 4 control/4KO pups) and *YapTaz* iEC-KO (n=5 control/4 KO pups). Data are mean +/- SD. *p* values were calculated using unpaired *t*-test. ns, *p*>0.05. Scale bar: D-E 100µm, D'-E' 50µm.

**G**, Quantification of endothelial proliferation with increasing concentrations of VEGF treatment in YAP, TAZ and YAP/TAZ knockdown cells and control. HUVECs were treated with 0, 4, 20 or 100 ng/mL VEGF for 24h and the percentage of cells in S phase was determined by flow cytometry. Graph shows the mean + SD fold change in percentage of S phase positive cells relative to 0 ng/mL of VEGF treatment. n= 3 independent experiments; > 50.000 cells analysed per experiment per condition.

**H**, Quantification of endothelial proliferation after stretch in YAP, TAZ, YAP/TAZ and VE-Cadherin knockdown cells and control. HUVECs were subjected to cyclic stretch for 24h and percentage of cells in S phase was determined by EdU pulsing and immunofluorescence staining. Graph shows the mean + SD fold change in percentage of S phase positive cells of stretched to non stretched cells for each knockdown condition. n= 5 independent experiments, > 100 cells counted per experiment per condition. *p* values were calculated using unpaired *t*-test. ns, *p*>0.05; \*, *p*<0.05.



Figure 3 - Figure supplement 1

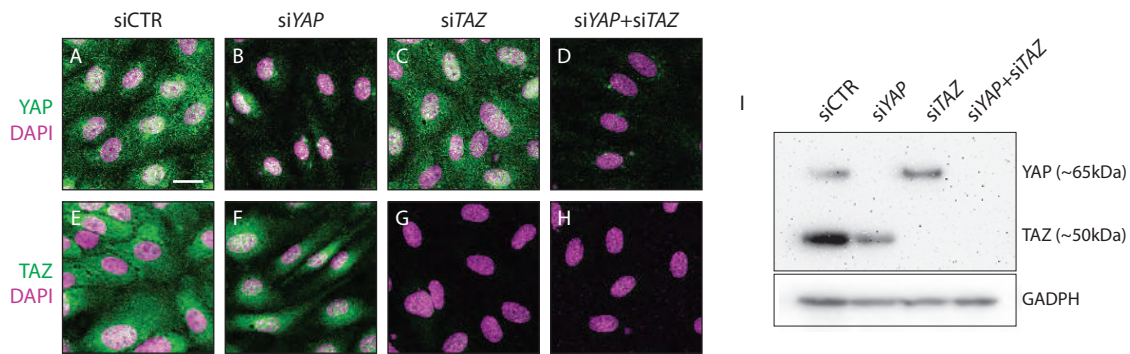

**Figure 3 – Figure supplement 1. YAP and TAZ proteins are lost after gene knockdown by siRNA in HUVECs.** HUVECs were treated with non targeting siRNA (siCTR) or siRNA targeting *YAP*, *TAZ* and *YAP + TAZ* for 24h. **A-H**, Immunofluorescence staining for YAP (green, **A-D**) or TAZ (green, **E-H**) and labelling of nuclei with DAPI (magenta) 72h after siRNA transfection. Scale bar: 10 $\mu$ m. **I**, Western blot for YAP/TAZ and GAPDH 72h after siRNA transfection.

Figure 3 - Figure supplement 2

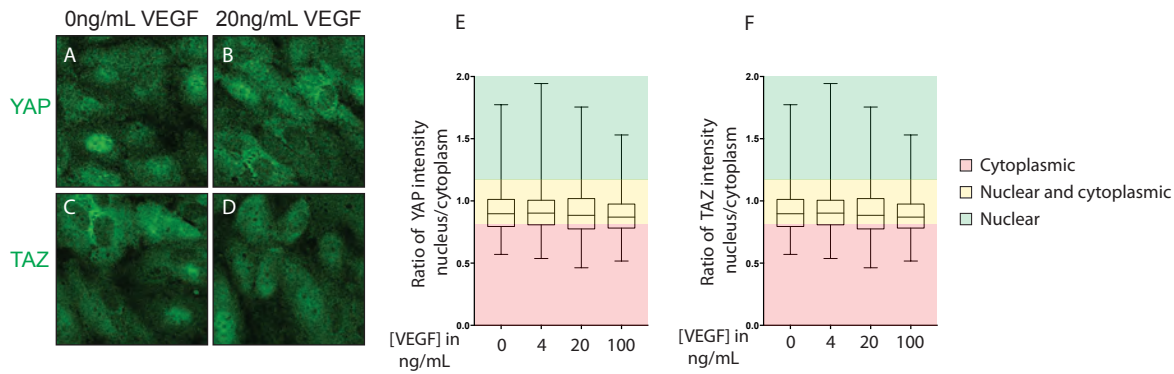

**Figure 3 – Figure supplement 2. VEGF treatment does not affect YAP and TAZ subcellular localisation.**

Confluent HUVECs were treated with 0, 4, 20 or 100ng/mL of VEGF for 6h.

**A-D**, Immunofluorescence staining for YAP (**A,B**) and TAZ (**C,D**) after 6h of 0 and 20 ng/mL of VEGF treatment.

**E,F**, Quantification of YAP (**E**) and TAZ (**F**) subcellular localisation with increasing concentrations of VEGF treatment. Data represent ratio of YAP (**E**) or TAZ (**F**) staining intensity in the nucleus/cytoplasm. Cytoplasmic, ratio < 0.8; nuclear and cytoplasmic, ratio between 0.8-1.2; nuclear, ratio > 1.2. Box and whiskers graph of one representative experiment out of 3. Whiskers are min to maximum. n= 3 independent experiments; > 500 cells analysed per condition per experiment.

Figure 4

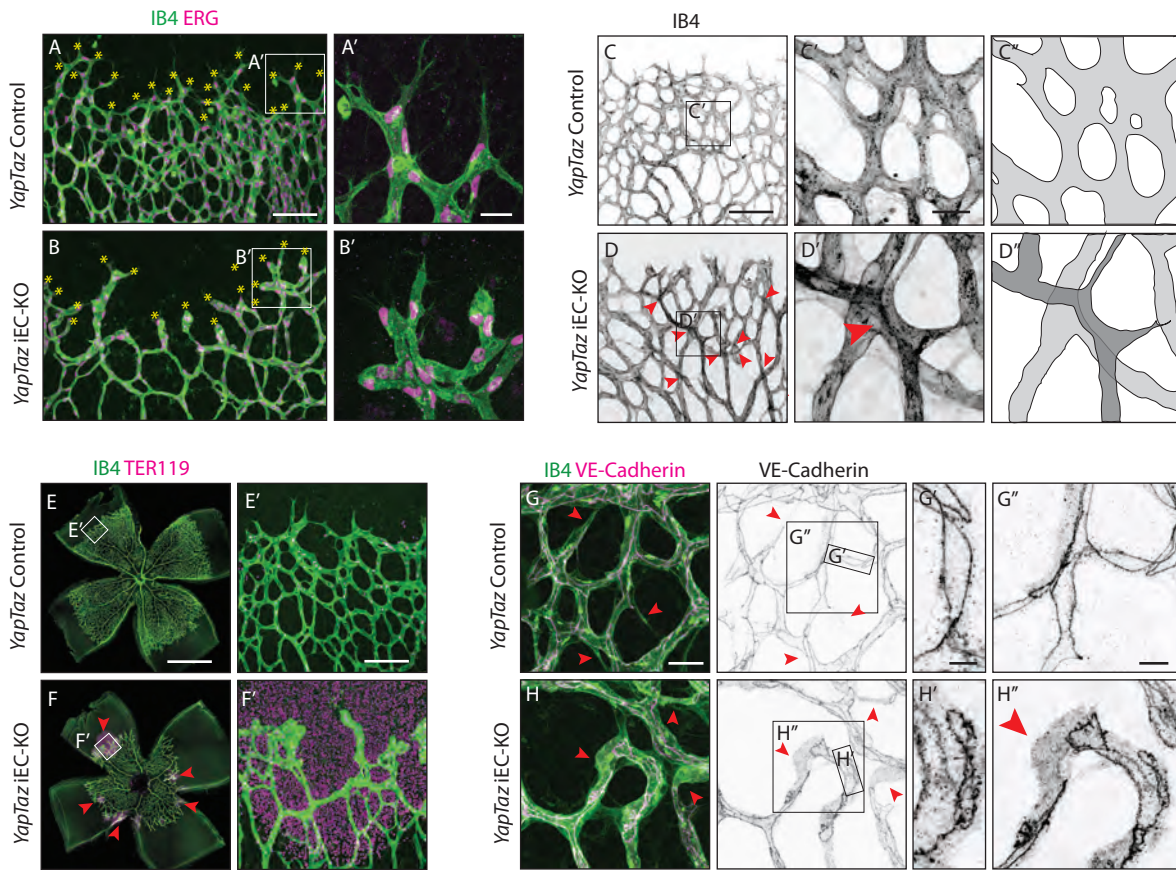

**Figure 4. Combined loss of YAP and TAZ leads to decreased sprouting numbers and shape defects, vessel crosses, haemorrhages at the sprouting front and adherens junctions' defects *in vivo*.**

**A,B**, P6 retinal vessels labelled with IB4 (green) and stained for ERG (magenta, marking endothelial nuclei) in *YapTaz* iEC-KO (B) and littermate control mice (A). Yellow asterisks mark sprouts. A', B', magnification of boxed areas in A and B. n=9 control/9 KO pups. Scale bar: A,B 100µm, A', B' 25µm.

**C,D**, P6 retinal vessels labelled with IB4 in *YapTaz* iEC-KO (D) and littermate control mice (E). Red arrowheads, vessel crosses. C', D', magnification of boxed areas in C,D. C'', D'', depiction of vessels in C' and D'; different colours represent vessels in different 3D planes. n=4 control/4 KO pups. Scale bar: C,D 100µm, C'-D' 20µm.

**E,F**, P6 retinal vessels labelled with IB4 (green) and stained for TER119 (magenta, marking red blood cells) in *YapTaz* iEC-KO (F) and littermate control mice (E). Red arrowheads, haemorrhages. E', F', magnification of boxed areas in E and F. n=4 control/5 KO pups. Scale bar: E,F 1000µm, E', F' 100µm.

**G,H**, P6 retinal vessels labelled with IB4 (green) and stained for VE-Cadherin (magenta) in *YapTaz* iEC-KO (H) and littermate control mice (G). Red arrowheads, no longitudinal VE-Cadherin labelled junction along vessel axis denoting unicellular vessel segments. G', H', G'', H'', magnification of boxed areas in G and H. n=4 control/4 KO pups. Scale bar: G,H 25µm, G', H' 5µm, G'', H'' 10µm.

Figure 4 - Figure supplement 1

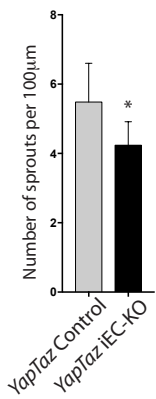

**Figure 4 - Figure supplement 1. Combined loss of YAP and TAZ leads to decreased number of sprouts in the developing mouse retina.**

Quantification of number of sprouts per 100 μm of sprouting front extension at P6 in *YapTaz* iEC-KO (n= 9 pups) and littermate control mice (n=9 pups). Data are mean + SD. p values were calculated using unpaired t-test. \*, p<0.05.

Figure 5

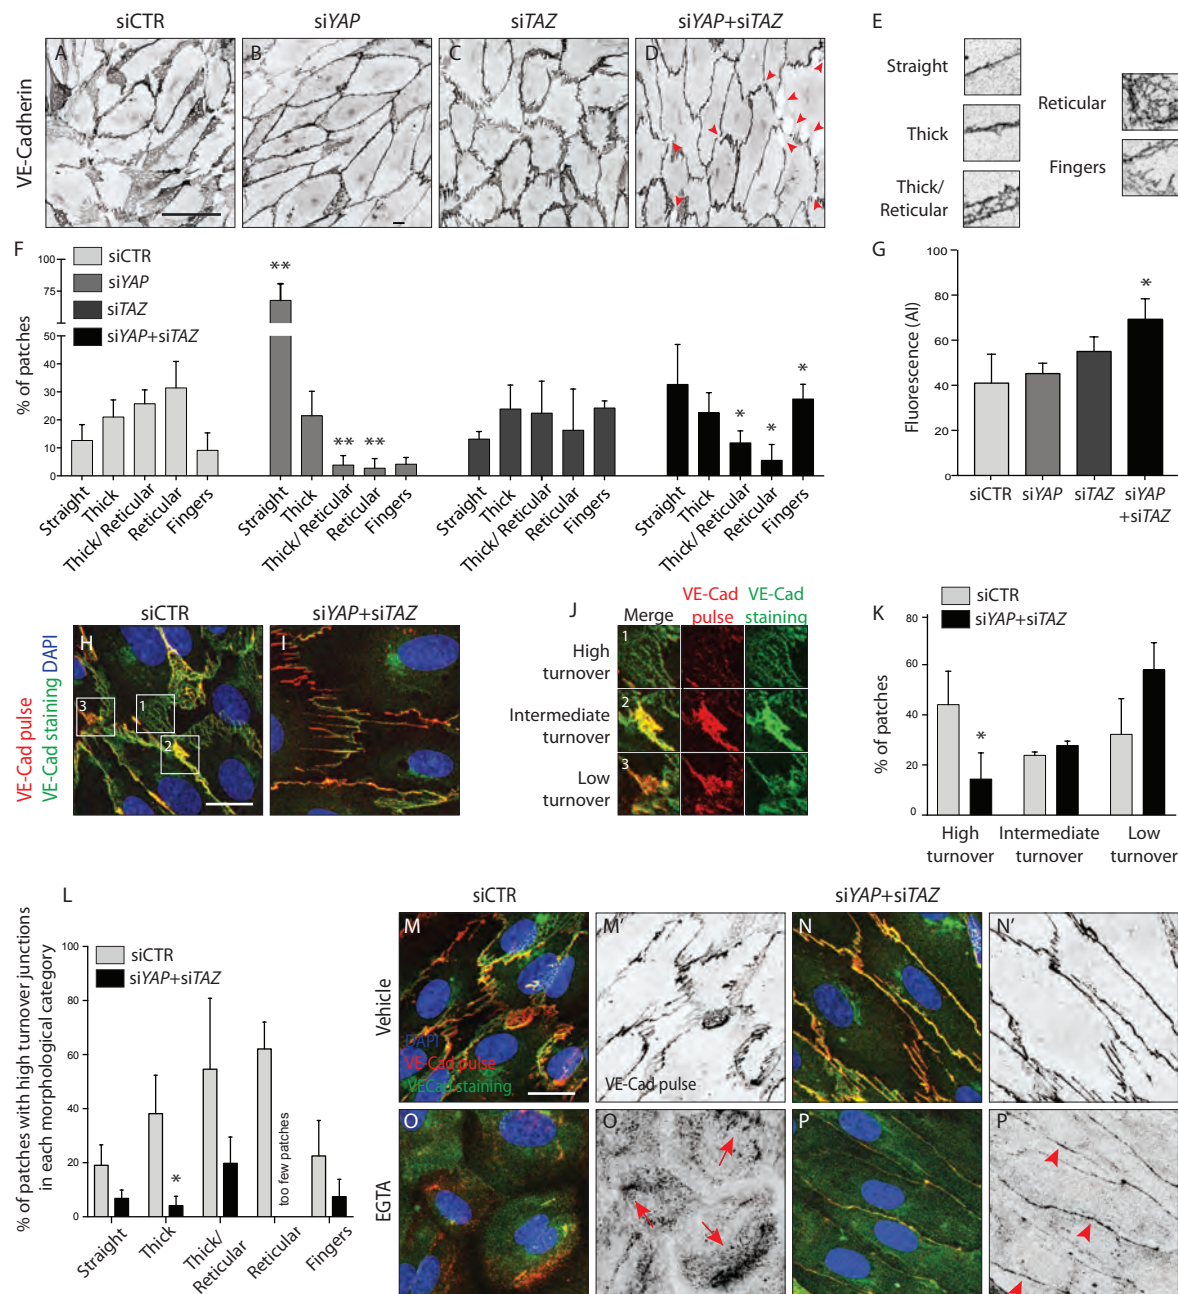

**Figure 5. YAP and TAZ regulate adherens junctions' morphology, monolayer permeability and VE-Cadherin turnover *in vitro*.**

**A-D.** HUVECs knocked down for YAP (B), TAZ (C) and YAP/TAZ (D) and control (A) stained for VE-Cadherin. Red arrowheads, discontinuous VE-Cadherin. Scale bar: 50µm. **E.** Representative patches used for manual morphological classification of adherens junctions in 5 categories: straight junctions, thick junctions, straight to reticular junctions, reticular junctions and fingers. **F.** Morphological analysis of VE-Cadherin labelled cell junctions in HUVECs knocked down for YAP, TAZ and YAP/TAZ. Data are mean percentage + SD of 3 independent experiments (2 for siTAZ). n> 140 patches of VE-Cadherin stained HUVECs per knockdown condition per experiment. *p* values were calculated using unpaired *t*-test between knocked down cells for YAP, TAZ and YAP/TAZ and control. \*, *p*<0.05; \*\*, *p*<0.01. **G.** Permeability of YAP, TAZ and YAP/TAZ knockdown monolayers of HUVECs to 250kDa fluorescent dextran molecules. Data are mean + SD of 3 independent experiments. *p* values were calculated using unpaired *t*-test between knocked down cells for YAP, TAZ and YAP/TAZ and control. \*, *p*<0.05. **H, I.** HUVECs knocked down for YAP/TAZ (I) and control (H) triple labelled with DAPI (blue), pulsed VE-Cadherin 55-7HI (red, VE-Cadherin pulse), and surface VE-Cadherin (green, VE-Cadherin staining). VE-Cadherin 55-7HI pulse was done for 30 minutes and cells were fixed 2 hours after end of pulse. Scale bar: 20µm. **J.** Representative patches used for manual classification of junctions into high, intermediate and low turnover. **K.** Quantification of junctional turnover in YAP/TAZ knockdown cells and control. **L.** Quantification of the percentage of high turnover junctions in each morphological category in YAP/TAZ knockdown cells and control. **K, L.** Data are mean + SD of 3 independent experiments. n> 70 patches per knockdown condition per experiment. Fewer than 5 patches were reticular in YAP/TAZ knockdown, not allowing for reliable assessment of percentages between high, intermediate and low turnover. *p* values were calculated using unpaired *t*-test. \*, *p*<0.05. **M-P.** HUVECs knocked down for YAP/TAZ (N,N',P,P') and control (M,M',O,O') triple labelled with DAPI (blue), pulsed VE-Cadherin 55-7HI (red, VE-Cadherin pulse), and surface VE-Cadherin (green, VE-Cadherin staining) after treatment with EGTA (O,O',P,P') or vehicle (M,M',N,N'). VE-Cadherin 55-7HI pulse was done for 30 minutes and cells were fixed 30 minutes after end of pulse, during which time were incubated with EGTA or vehicle. Red arrows, intracellular accumulation of pulsed VE-cadherin. Red arrowheads, pulsed VE-Cadherin at the junction. Scale bar: 20µm.

**M-P.** HUVECs knocked down for YAP/TAZ (N,N',P,P') and control (M,M',O,O') triple labelled with DAPI (blue), pulsed VE-Cadherin 55-7HI (red, VE-Cadherin pulse), and surface VE-Cadherin (green, VE-Cadherin staining) after treatment with EGTA (O,O',P,P') or vehicle (M,M',N,N'). VE-Cadherin 55-7HI pulse was done for 30 minutes and cells were fixed 30 minutes after end of pulse, during which time were incubated with EGTA or vehicle. Red arrows, intracellular accumulation of pulsed VE-cadherin. Red arrowheads, pulsed VE-Cadherin at the junction. Scale bar: 20µm.

Figure 6

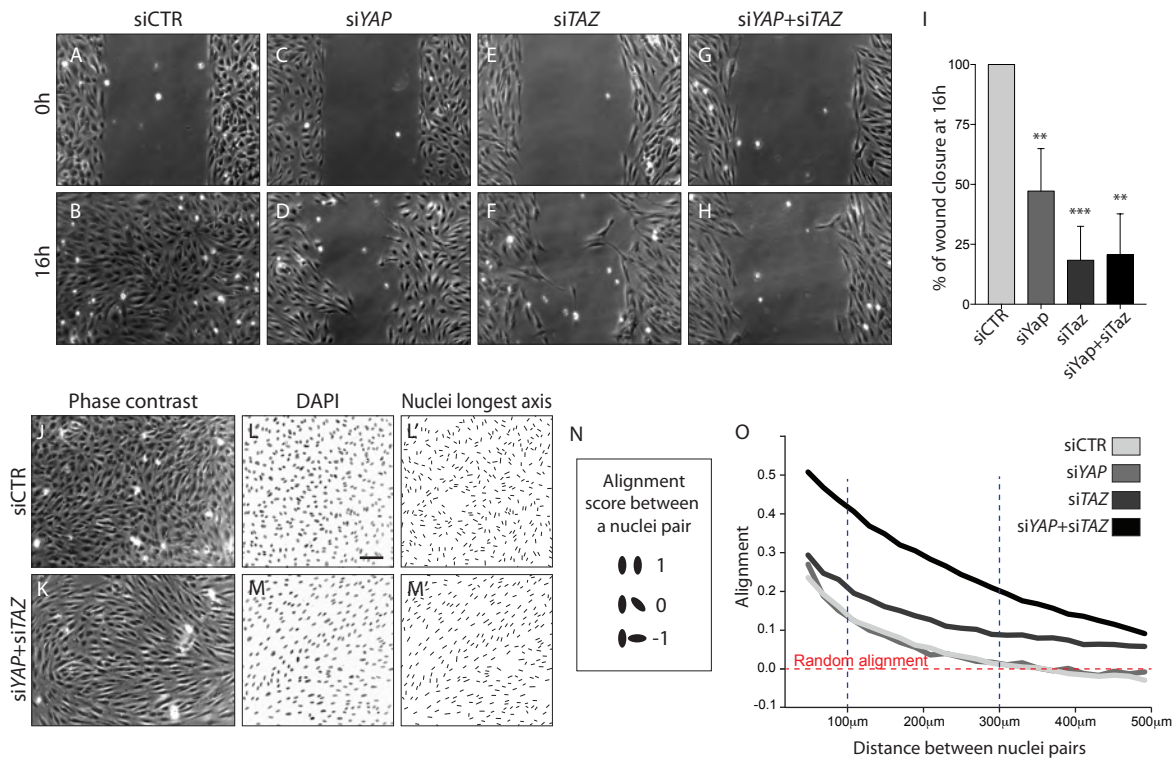

**Figure 6. YAP and TAZ are required for uncoupled, individual cell migration.**

**A-H**, Phase contrast images of YAP (C,D), TAZ (E,F) and YAP/TAZ (G,H) knockdown HUVECs and control (A,B) immediately after removing barrier to create a cell free space (A,C,E,G) and 16 hours later (B,D,F,H). **I**, Quantification of wound closure at 16 hours. Data are mean + SD of 3 independent experiments. *p* values were calculated using unpaired *t*-test between knocked down cells for YAP, TAZ or YAP/TAZ and control. \*\*, *p*<0.01; \*\*\*, *p*<0.001.

**J,K**, Phase contrast images of YAP/TAZ knockdown monolayer of HUVECs (K) and control (J). **L,M**, Fluorescence labelling of nuclei with DAPI of YAP/TAZ knockdown monolayer of HUVECs (M) and control (L). Scale bar: 100µm. **L',M'**, Longest axis of nuclei. **N**, Alignment score between nuclei pairs used for quantification of cell coordination in O. Angles made by the nuclei longest axis of a pair of nuclei were calculated; angles of 0, 45 and 90 degrees scored 1,0 and -1 in alignment. **O**, Coordination plot of monolayers of HUVECs knocked down for Yap, Taz and Yap and Taz and control. Graph shows mean alignment score of all pairs of cells in the monolayer plotted against distance between them. Randomly aligned cells score 0 in mean alignment. *n* = 3 independent experiments, >10.000 pairs of nuclei analysed per knockdown condition per experiment.

Figure 7

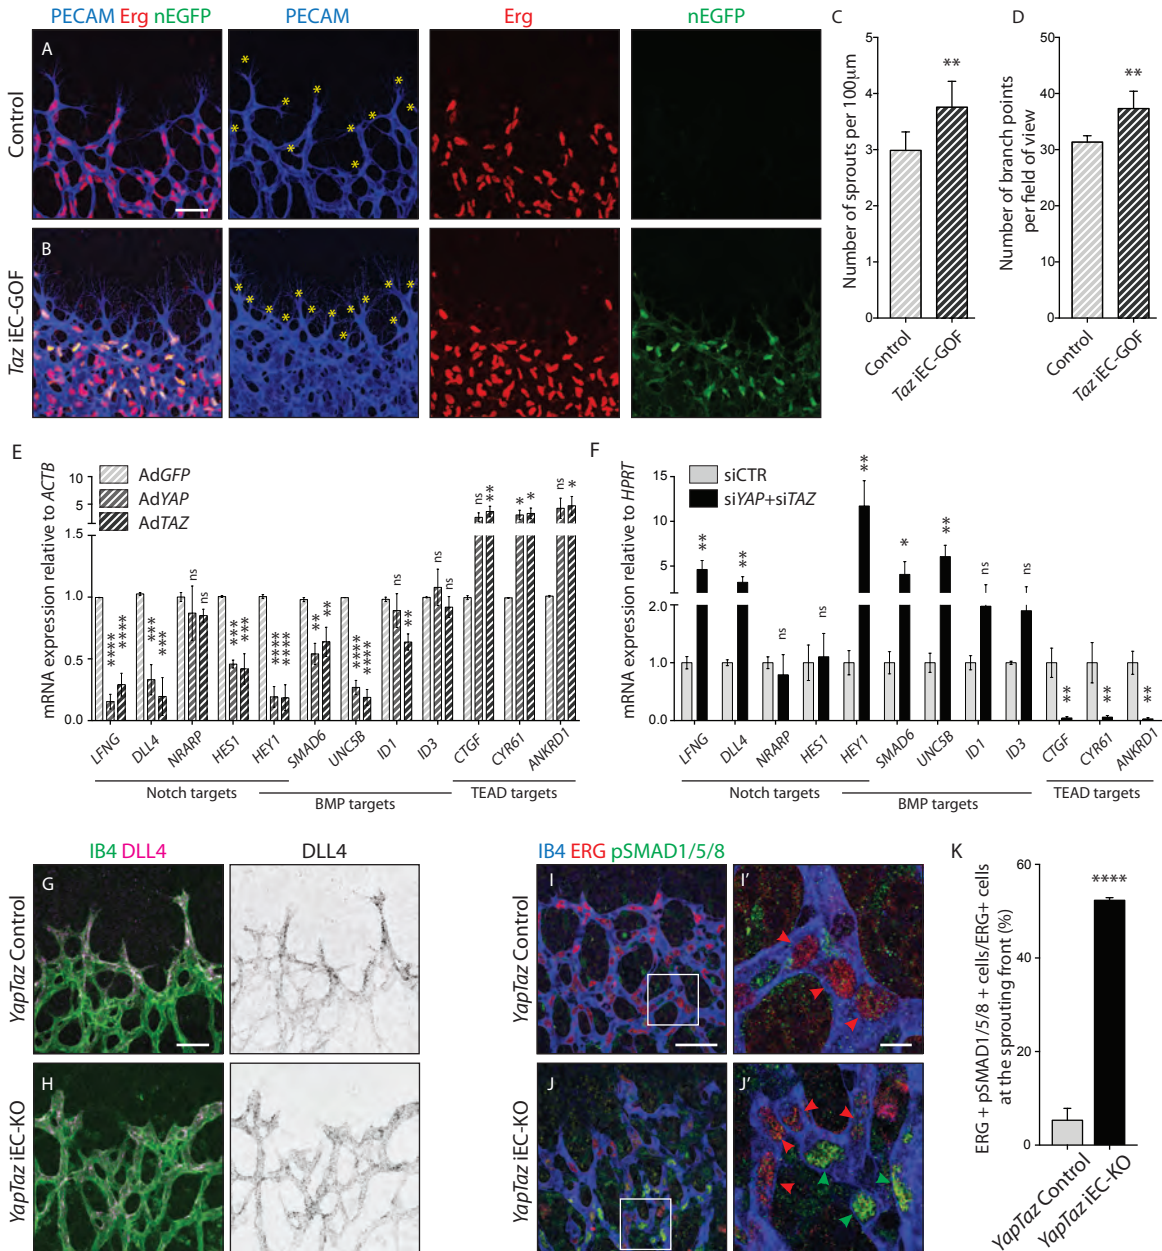

**Figure 7. Nuclear YAP and TAZ inhibit Notch and BMP signalling in endothelial cells.**

**A-B**, Retinas from P6 *Taz* iEC-GOF (B) and control pups (A) were stained for the endothelial marker PECAM (blue) and the endothelial nuclei marker ERG (red). *Taz* iEC-GOF mice express mosaically nuclear EGFP (nEGFP, green) marking cells expressing the TAZ gain of function mutation TAZS89A. Yellow asterisks mark sprouts. Images correspond to maximum projection of z stack. Scale bar: 50 μm. **C**, Quantification of number of sprouts per 100 μm of sprouting front extension at P6 in *Taz* iEC-GOF mice (n= 6 pups) and littermate control mice (n=6 pups). Data are mean + SD. *p* values were calculated using unpaired *t*-test. \*\*, *p*<0.01. **D**, Quantification of branching frequency (i.e. number of branching points per field of view) in *Taz* iEC-GOF mice (n= 6 pups) and littermate control mice (n=6 pups). Data are mean + SD. *p* values were calculated using unpaired *t*-test. \*\*, *p*<0.01.

**E**, Reverse transcriptase PCR of HUVECs transduced with adenoviruses carrying *YAP* (Ad*YAP*) and *TAZ* (Ad*TAZ*) constitutively active forms and control (Ad*GFP*). Data are mean + SD of 3 independent experiments. *p* values were calculated using one-way ANOVA. \*, *p*<0.05; \*\*, *p*<0.01; \*\*\*, *p*<0.001; \*\*\*\*, *p*<0.0001.

**F**, Reverse transcriptase PCR of *YAP/TAZ* knockdown HUVECs and control. Data are mean + SD of 3 independent experiments. *p* values were calculated using unpaired *t*-test. \*, *p*<0.05; \*\*, *p*<0.01; \*\*\*, *p*<0.001; \*\*\*\*, *p*<0.0001.

**G,H**, P6 retinal vessels labelled with IB4 (green) and stained for DLL4 (magenta) in *YapTaz* iEC-KO mice (H) and littermate control mice (G). Images correspond to maximum projection of z stack. Scale bar: 50 μm.

**I,J**, P6 retinal vessels labelled with IB4 (blue) and stained for ERG (red, marking endothelial nuclei) and pSMAD1/5/8 (green) in *YapTaz* iEC-KO (J) and littermate control mice (I). Images correspond to single confocal planes. I', J', magnification of boxed areas in I and J. Red arrowheads, endothelial nuclei negative for pSMAD1/5/8. Green arrowheads, endothelial nuclei positive for pSMAD1/5/8. Scale bar: I, J 50 μm, I', J' 10 μm.

**K**, Quantification of endothelial cells positive for pSMAD1/5/8 at the sprouting front of the P6 retina in *YapTaz* iEC-KO (n= 3 pups) and littermate control mice (n=3 pups). Data are mean percentage + SD. *p* values were calculated using unpaired *t*-test. \*\*\*\*, *p*<0.0001.

Figure 7 - Figure Supplement 1

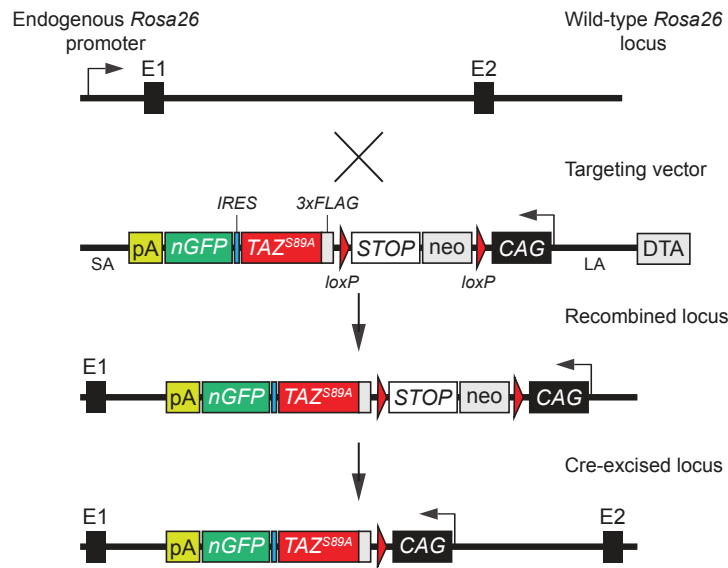

**Figure 7 - Figure supplement 1. Targeting strategy used for the generation of the conditional TAZ gain-of-function mouse model.**

cDNA coding for a 3xFLAG-tagged human TAZ S89A was inserted into a *Rosa26* targeting vector downstream of the ubiquitous CAG promoter. The cDNA also included an internal ribosome entry sequence (IRES) and a nuclear-localized enhanced green fluorescence protein (nEGFP) for monitoring transgene expression. To allow Cre-dependent expression of 3xFLAG-TAZS89A and of the EGFP reporter, a floxed transcriptional STOP cassette was incorporated between the 3xFLAG-TAZS89A-IRES-nEGFP sequence and the CAG promoter.



Figure 7 - Figure Supplement 2

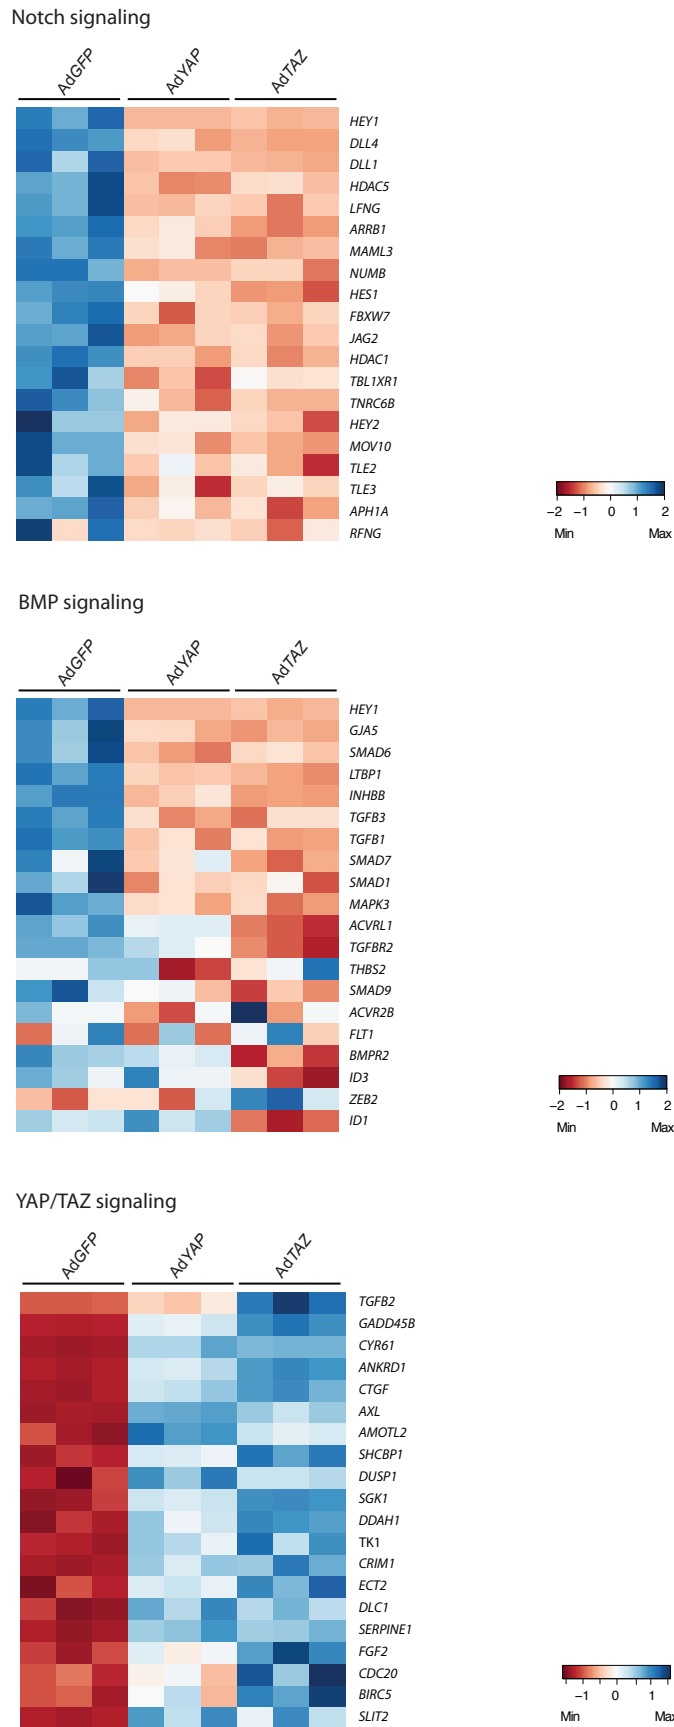

**Figure 7 - Figure supplement 2. Microarray of YAP and TAZ gain of function mutant cells.**  
Heatmaps of Notch, BMP and Hippo pathway genes in control (AdGFP), AdYAP and AdTAZ HUVECs.

Figure 7 - Figure Supplement 3

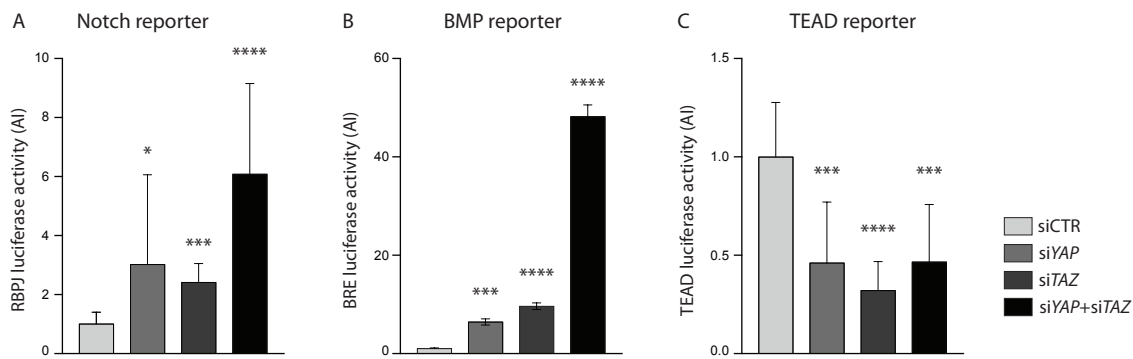

**Figure 7 - Figure supplement 3. YAP and TAZ knockdown increases Notch and BMP reporter activities *in vitro*.**

**A-C**, Luciferase reporter assays in YAP, TAZ and YAP/TAZ knockdown HUVECs and controls for Notch reporter (A), BMP reporter (B) and TEAD reporter (C). Data are mean + SD. *p* values were calculated using unpaired *t*-test.  $n \geq 3$  experiments for Notch reporter, 3 experiments for BMP reporter,  $\geq 6$  experiments for TEAD reporter. \*,  $p < 0.05$ ; \*\*,  $p < 0.01$ ; \*\*\*,  $p < 0.001$ ; \*\*\*\*,  $p < 0.0001$ .

Figure 7 - Figure Supplement 4

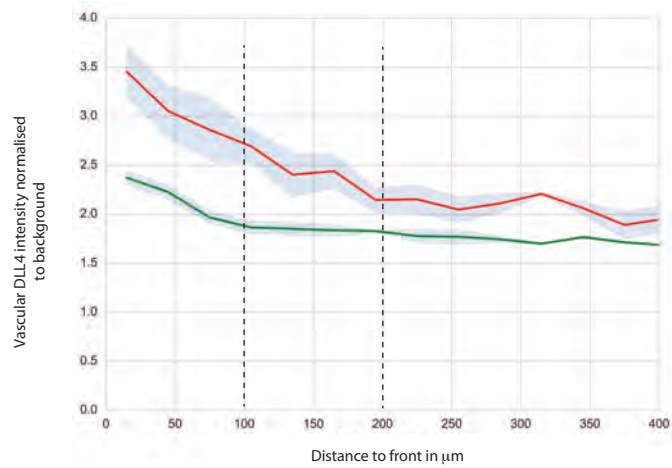

**Figure 7 - Figure supplement 4. DLL4 intensity in *YapTaz* iEC-KO.**

Graph shows mean DLL4 staining intensity in the vascular retina of control (green) and *YapTaz* iEC-KO (red) P6 pups normalised to the background intensity. Data are mean  $\pm$  SEM.  $n = 3$  control and 3 *YapTaz* iEC-KO.

|                              | Reference     | Dilution | Company                  |                  |
|------------------------------|---------------|----------|--------------------------|------------------|
| Yap                          | 46189         | 1:100    | ThermoFisher Scientific  | Retinas + HUVECs |
| Taz                          | HPA007415     | 1:100    | Sigma                    | Retinas + HUVECs |
| Erg                          | sc-18136      | 1:100    | Santa Cruz Biotechnology | Retinas          |
| Erg                          | Ab92513       | 1:1000   | Abcam                    | Retinas          |
| VE-Cadherin                  | 555289        | 1:100    | BD Biosciences           | Retinas          |
| TER-119                      | MAB1125       | 1:100    | R&D Systems              | Retinas          |
| PECAM-1                      | AF3628        | 1:200    | R&D Systems              | Retinas          |
| Cleaved Caspase 3            | AF835         | 1:200    | R&D Systems              | Retinas          |
| Dll4                         | AF1389        | 1:100    | R&D Systems              | Retinas          |
| pSMAD1/5/8                   | 13820S        | 1:1000   | Cell Signalling          | Retinas          |
| Ib4-Alexa-Fluor<br>Conjugate | 647<br>I32450 | 1:1000   | ThermoFisher Scientific  | Retinas + HUVECs |
| Ib4-Alexa-Fluor<br>Conjugate | 488<br>I21411 | 1:1000   | ThermoFisher Scientific  | Retinas + HUVECs |
| Ib4-Alexa-Fluor<br>Conjugate | 568<br>I21412 | 1:1000   | ThermoFisher Scientific  | Retinas + HUVECs |

**Supplementary table 1.** List of primary antibodies used.

| Target | Assay ID      |
|--------|---------------|
| LFNG   | Hs00385436_g1 |
| DLL4   | Hs00184092_m1 |
| NRARP  | Hs04183811_s1 |
| Hes1   | Hs00172878_m1 |
| Hey1   | Hs01114113_m1 |
| SMAD6  | Hs00178579_m1 |
| ENG    | Hs00923996_m1 |
| UNC5B  | Hs00900710_m1 |
| ID1    | Hs03676575_s1 |
| ID3    | Hs00171409_m1 |
| CTGF   | Hs00170014_m1 |
| CYR61  | Hs00998500_g1 |
| ANKRD1 | Hs00923599_m1 |
| INHBA1 | Hs01081598_m1 |
| HPRT1  | Hs02800695_m1 |
| ACTB   | Hs99999903_m1 |

**Supplementary table 2.** List of the TaqMan primers (Applied Biosystems) used.
